# Supplementary material for: A simple and efficient approach to 2-alkynylbenzofurans under mild copper(i)-catalyzed conditions
Source: Royal Society of Chemistry journal article supplement (doi:10.1039/c3ra00093a), 2013-01-01

## **A Simple and Efficient Approach to 2-Alkynylbenzofurans under Mild Copper (I)-Catalyzed Conditions**

Jianming Liu,<sup>a</sup> Ningfei Zhang,<sup>a</sup> Yuanyuan Yue,<sup>a</sup> Dong Wang,<sup>b</sup> Yuanli Zhang,<sup>a</sup> Xin Zhang,<sup>a</sup> and Kelei Zhuo\*<sup>a</sup>

<sup>a</sup>Key Laboratory of Green Chemical Media and Reactions, Ministry of Education, School of Chemistry and Chemical Engineering, Henan Normal University, Xinxiang, Henan 453007, P. R. China.

<sup>b</sup>Department of Bio-Health Technology, College of Biomedical Science, Kangwon National University, Chuncheon, Gangwon-Do, 200-701, Korea

E-mail: [klzhuo@263.cn](mailto:klzhuo@263.cn)

### **Contents**

- 1. General information**
- 2. Experimental procedure for copper(I)-catalyzed tandem reactions of gem-dihaloolefins**
- 3. Experimental procedure for Pd/C-catalyzed environmentally benign process for the oxidation of 2-alkynylbenzofuran to corresponding benzil derivatives.**
- 4. Experiments on investigation of mechanism**
- 5. Characterization data for products**
- 6. <sup>1</sup>H NMR and <sup>13</sup>C NMR copies of products**

## 1. General information

All the chemicals and solvents were used as received without further purification. Silica gel was purchased from Qing Dao Hai Lang Chemical Industry Co. NMR spectra of the products were recorded using a Bruker Avance TM spectrometer operating at 400 MHz for  $^1\text{H}$  and 100 MHz for  $^{13}\text{C}$  in  $\text{CDCl}_3$  unless otherwise noted. High resolution mass spectra (HRMS) of the products were obtained on a Bruker Daltonics microTOF-Q spectrometer.

## 2. Experimental procedure for copper(I)-catalyzed tandem reactions of gem-dihaloolefins

A mixture of gem-dihaloolefins (1.0 mmol), phenylacetylenes (1.5 mmol), CuI (15 mol %), DABCO (30 mol %),  $\text{Cs}_2\text{CO}_3$  (2.0 equiv), and DMF (5.0 mL) in a Schlenk tube was stirred under  $\text{N}_2$  at 140 °C (oil bar temperature) for 24h. After cooling to room temperature, water (30 mL) was added and the aqueous phase was extracted by EtOAc (5×30 mL). The combined organic phases were dried over  $\text{Na}_2\text{SO}_4$ , and concentrated in vacuum. The residue was purified by flash column chromatography (hexane or hexane /ethyl acetate) to afford the corresponding coupled products.

## 3. Experimental procedure for the oxidation of 2-alkynylbenzofuran to corresponding benzil derivatives.

A mixture of 2-alkynylbenzofuran (1.0 mmol), 10% Pd/C (0.10 mmol), and DMSO (3.0 mL), was stirred under an oxygen (balloon) atmosphere at 120 °C (oil bar temperature) for 24h. After cooling to room temperature, water (30 mL) was added and the aqueous phase was extracted by EtOAc (5×30 mL). The combined organic phases were dried over  $\text{Na}_2\text{SO}_4$ , and concentrated in vacuum. The residue was purified by flash column chromatography (hexane or hexane /ethyl acetate) to afford the corresponding coupled products.

## 4. Experiments on investigation of mechanism

### 4.1 Copper(I)-catalyzed tandem reactions of gem-dihaloolefins and (phenylethynyl)copper.

A mixture of gem-dihaloolefins (1.0 mmol), (phenylethynyl)copper (1.5 mmol), CuI (15 mol %), DABCO (30 mol %),  $\text{Cs}_2\text{CO}_3$  (2.0 equiv), and DMF (5.0 mL) in a Schlenk tube was

stirred under N<sub>2</sub> at 140 °C (oil bath temperature) for 24h. After cooling to room temperature, water (30 mL) was added and the aqueous phase was extracted by EtOAc (5×30 mL). The combined organic phases were dried over Na<sub>2</sub>SO<sub>4</sub>, and concentrated in *vacuum*. The residue was purified by flash column chromatography (hexane or hexane /ethyl acetate) to afford the corresponding coupled products.

#### **4.2 Copper(I)-catalyzed tandem reactions of 2-bromobenzofuran and (phenylethynyl)copper.**

A mixture of 2-bromobenzofuran (1.0 mmol), (phenylethynyl)copper (1.5 mmol), CuI (15 mol %), DABCO (30 mol %), Cs<sub>2</sub>CO<sub>3</sub> (2.0 equiv), and DMF (5.0 mL) in a Schlenk tube was stirred under N<sub>2</sub> at 140 °C (oil bath temperature) for 24h. After cooling to room temperature, water (30 mL) was added and the aqueous phase was extracted by EtOAc (5×30 mL). The combined organic phases were dried over Na<sub>2</sub>SO<sub>4</sub>, and concentrated in *vacuum*. The residue was purified by flash column chromatography (hexane or hexane /ethyl acetate) to afford the corresponding coupled products.

## 5. Characterization data for products

### 2-(phenylethynyl)benzofuran

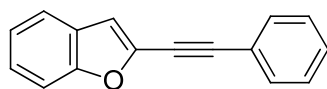

$^1\text{H}$  NMR (400 MHz,  $\text{CDCl}_3$ )  $\delta$  7.62 (dt,  $J = 6.9, 2.8$  Hz, 3H), 7.52 (d,  $J = 8.3$  Hz, 1H), 7.46-7.33 (m, 4H), 7.33-7.26 (m, 1H), 7.06 (d,  $J = 2.7$  Hz, 1H).  $^{13}\text{C}$  NMR (100 MHz,  $\text{CDCl}_3$ )  $\delta$  156.77, 140.63, 133.53, 131.01, 130.35, 129.60, 127.46, 125.16, 123.70, 123.06, 113.45, 113.10, 96.92, 81.55. HRMS, calculated for  $\text{C}_{16}\text{H}_{11}\text{O}$  ( $\text{M}+\text{H}^+$ ):219.0804, found: 219.0808 ( $\text{M}+\text{H}^+$ ).

### 2-(p-tolyethynyl)benzofuran

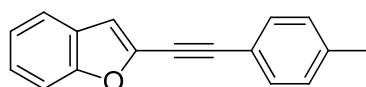

$^1\text{H}$  NMR (400 MHz,  $\text{CDCl}_3$ )  $\delta$  7.58 (dq,  $J = 7.7, 1.1$  Hz, 1H), 7.48 (dt,  $J = 8.2, 1.6$  Hz, 3H), 7.34 (tt,  $J = 8.4, 1.4$  Hz, 1H), 7.29-7.16 (m, 3H), 6.99 (t,  $J = 1.2$  Hz, 1H), 2.39 (d,  $J = 1.6$  Hz, 3H).  $^{13}\text{C}$  NMR (100 MHz,  $\text{CDCl}_3$ )  $\delta$  156.70, 141.33, 140.81, 133.44, 131.11, 129.65, 127.31, 125.09, 122.97, 120.58, 113.08, 113.05, 97.15, 80.89, 23.47. HRMS, calculated for  $\text{C}_{17}\text{H}_{13}\text{O}$  ( $\text{M}+\text{H}^+$ ):233.0961, found: 233.0962 ( $\text{M}+\text{H}^+$ ).

### 2-((4-methoxyphenyl)ethynyl)benzofuran

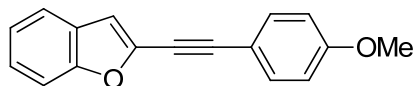

$^1\text{H}$  NMR (400 MHz,  $\text{CDCl}_3$ )  $\delta$  7.63-7.46 (m, 4H), 7.37 (t,  $J = 7.8$  Hz, 1H), 7.29 (dd,  $J = 9.0, 5.6$  Hz, 1H), 7.02-6.88 (m, 3H), 3.87 (s, 3H).  $^{13}\text{C}$  NMR (100 MHz,  $\text{CDCl}_3$ )  $\delta$  162.18, 156.69, 140.99, 135.15, 129.73, 127.26, 125.11, 122.96, 116.04, 115.68, 113.04, 112.83, 97.11, 80.37, 57.18. HRMS, calculated for  $\text{C}_{17}\text{H}_{12}\text{Na}_2$  ( $\text{M}+\text{Na}^+$ ):271.0730, found: 271.0727 ( $\text{M}+\text{Na}^+$ ).

### 2-((4-chlorophenyl)ethynyl)benzofuran

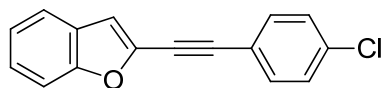

$^1\text{H}$  NMR (400 MHz,  $\text{CDCl}_3$ )  $\delta$  7.58 (dq,  $J = 7.8, 1.1$  Hz, 1H), 7.53-7.46 (m, 3H), 7.39-7.33 (m, 3H), 7.29-7.24 (m, 1H), 7.03 (t,  $J = 1.1$  Hz, 1H).  $^{13}\text{C}$  NMR (100 MHz,  $\text{CDCl}_3$ )  $\delta$  156.80, 140.28, 137.11, 134.67, 130.74, 129.48, 127.60, 125.22, 123.11, 122.18, 113.76, 113.11, 95.74, 82.44. ESI-MS: 252

### 2-((4-fluorophenyl)ethynyl)benzofuran

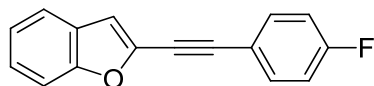

$^1\text{H}$  NMR (400 MHz,  $\text{CDCl}_3$ )  $\delta$  7.61 (t,  $J = 7.1$  Hz, 3H), 7.52 (d,  $J = 8.4$  Hz, 1H), 7.39 (t,  $J = 7.8$  Hz, 1H), 7.34-7.26 (m, 1H), 7.12 (t,  $J = 8.4$  Hz, 2H), 7.05 (d,  $J = 3.1$  Hz, 1H).  $^{13}\text{C}$  NMR (100 MHz,  $\text{CDCl}_3$ )  $\delta$  166.10, 163.60, 156.75, 140.43, 135.57, 129.52, 127.50, 125.18, 123.06, 119.83, 117.86, 113.48, 95.79, 81.27. HRMS, calculated for  $\text{C}_{16}\text{H}_{10}\text{FO}$  ( $\text{M}+\text{H}^+$ ):237.0710, found: 237.0741( $\text{M}+\text{H}^+$ ).

#### 2-((4-(tert-butyl)phenyl)ethynyl)benzofuran

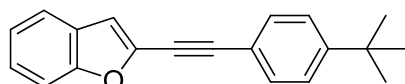

$^1\text{H}$  NMR (400 MHz,  $\text{CDCl}_3$ )  $\delta$  7.56 (td,  $J = 18.7, 8.0$  Hz, 4H), 7.44 (dd,  $J = 7.5, 3.1$  Hz, 2H), 7.37 (t,  $J = 7.9$  Hz, 1H), 7.32-7.28 (m, 1H), 7.03 (d,  $J = 2.7$  Hz, 1H), 1.37 (s, 9H).  $^{13}\text{C}$  NMR (100 MHz,  $\text{CDCl}_3$ )  $\delta$  156.70, 154.42, 140.85, 133.29, 129.66, 127.37, 127.31, 125.09, 122.97, 120.63, 113.12, 113.05, 97.17, 80.91, 36.77, 33.00. HRMS, calculated for  $\text{C}_{20}\text{H}_{19}\text{O}$  ( $\text{M}+\text{H}^+$ ):275.1430, found: 275.1413 ( $\text{M}+\text{H}^+$ ).

#### 5-methyl-2-(phenylethynyl)benzofuran

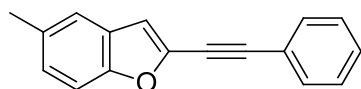

$^1\text{H}$  NMR (400 MHz,  $\text{CDCl}_3$ )  $\delta$  7.65-7.57 (m, 2H), 7.41 (dq,  $J = 9.2, 3.5, 2.8$  Hz, 5H), 7.19 (d,  $J = 8.5$  Hz, 1H), 6.98 (d,  $J = 3.4$  Hz, 1H), 2.48 (s, 3H).  $^{13}\text{C}$  NMR (100 MHz,  $\text{CDCl}_3$ )  $\delta$  155.24, 140.63, 134.64, 133.49, 130.92, 130.33, 129.68, 128.81, 123.77, 122.76, 113.26, 112.58, 96.74, 81.69, 23.16. HRMS, calculated for  $\text{C}_{17}\text{H}_{13}\text{O}$  ( $\text{M}+\text{H}^+$ ):233.0961, found: 233.0972 ( $\text{M}+\text{H}^+$ ).

#### 2-((4-methoxyphenyl)ethynyl)-5-methylbenzofuran

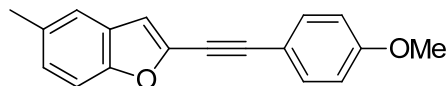

$^1\text{H}$  NMR (400 MHz,  $\text{CDCl}_3$ )  $\delta$  7.55 (dt,  $J = 8.8, 2.4$  Hz, 2H), 7.38 (t,  $J = 4.1$  Hz, 2H), 7.21-7.14 (m, 1H), 6.97-6.89 (m, 3H), 3.87 (s, 3H), 2.47 (s, 3H).  $^{13}\text{C}$  NMR (100 MHz,  $\text{CDCl}_3$ )  $\delta$  162.12, 155.14, 140.98, 135.10, 134.55, 129.79, 128.58, 122.66, 116.01, 115.76, 112.63, 112.50, 96.88, 80.49, 57.18, 23.16. HRMS, calculated for  $\text{C}_{18}\text{H}_{15}\text{O}_2$  ( $\text{M}+\text{H}^+$ ):263.1067, found: 263.1074 ( $\text{M}+\text{H}^+$ ).

#### 2-((4-chlorophenyl)ethynyl)-5-methylbenzofuran

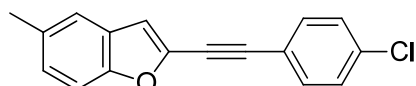

$^1\text{H}$  NMR (400 MHz,  $\text{CDCl}_3$ )  $\delta$  7.53 (d,  $J = 7.9$  Hz, 2H), 7.43-7.32 (m, 4H), 7.20 (d,  $J = 8.4$  Hz, 1H), 6.98 (s, 1H), 2.48 (s, 3H).  $^{13}\text{C}$  NMR (100 MHz,  $\text{CDCl}_3$ )  $\delta$  155.29, 140.30, 137.03, 134.72, 134.63, 130.72, 129.58, 128.98, 122.81, 122.26, 113.60, 112.60, 95.60, 82.65, 23.16. HRMS, calculated for  $\text{C}_{17}\text{H}_{12}\text{ClO}$  ( $\text{M}+\text{H}^+$ ):267.0571, found: 267.0601 ( $\text{M}+\text{H}^+$ ).

**2-((4-fluorophenyl)ethynyl)-5-methylbenzofuran**

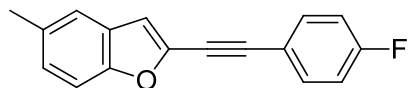

$^1\text{H}$  NMR (400 MHz,  $\text{CDCl}_3$ )  $\delta$  7.59 (ddd,  $J = 8.6, 4.7, 1.8$  Hz, 2H), 7.43-7.35 (m, 2H), 7.22-7.16 (m, 1H), 7.15-7.05 (m, 2H), 6.97 (d,  $J = 3.4$  Hz, 1H), 2.48 (s, 3H).  $^{13}\text{C}$  NMR (100 MHz,  $\text{CDCl}_3$ )  $\delta$  166.06, 163.56, 155.24, 140.45, 135.56, 134.68, 129.62, 128.87, 122.77, 119.94, 117.84, 117.62, 95.64, 81.45, 23.15. HRMS, calculated for  $\text{C}_{17}\text{H}_{12}\text{FO}$  ( $\text{M}+\text{H}^+$ ):251.0867, found: 251.0867 ( $\text{M}+\text{H}^+$ ).

**2-((4-(tert-butyl)phenyl)ethynyl)-5-methylbenzofuran**

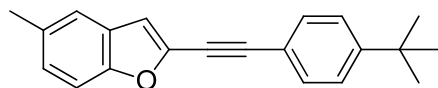

$^1\text{H}$  NMR (400 MHz,  $\text{CDCl}_3$ )  $\delta$  7.56-7.48 (m, 2H), 7.44-7.32 (m, 4H), 7.19-7.11 (m, 1H), 6.93 (dd,  $J = 4.1, 2.0$  Hz, 1H), 2.45 (d,  $J = 3.2$  Hz, 3H), 1.40-1.29 (m, 9H).  $^{13}\text{C}$  NMR (100 MHz,  $\text{CDCl}_3$ )  $\delta$  155.19, 154.34, 140.88, 134.57, 133.28, 129.77, 128.68, 127.36, 122.71, 120.72, 112.97, 112.54, 97.02, 81.11, 36.77, 33.01, 23.17. HRMS, calculated for  $\text{C}_{21}\text{H}_{21}\text{O}$  ( $\text{M}+\text{H}^+$ ):289.1587, found: 289.1595 ( $\text{M}+\text{H}^+$ ).

**6-methoxy-2-(phenylethynyl)benzofuran**

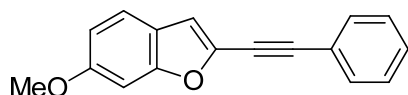

$^1\text{H}$  NMR (400 MHz,  $\text{CDCl}_3$ )  $\delta$  7.63-7.54 (m, 2H), 7.48-7.34 (m, 4H), 7.05-6.87 (m, 3H), 3.86 (s, 3H).  $^{13}\text{C}$  NMR (100 MHz,  $\text{CDCl}_3$ )  $\delta$  161.02, 157.91, 139.77, 133.38, 130.79, 130.32, 123.91, 123.17, 122.80, 114.59, 113.45, 97.40, 96.76, 81.73, 57.55. HRMS, calculated for  $\text{C}_{17}\text{H}_{13}\text{O}_2$  ( $\text{M}+\text{H}^+$ ):249.0910, found: 249.0897 ( $\text{M}+\text{H}^+$ ).

**6-methoxy-2-(p-tolyethynyl)benzofuran**

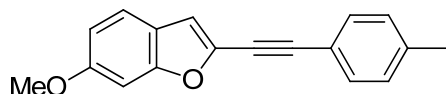

$^1\text{H}$  NMR (400 MHz,  $\text{CDCl}_3$ )  $\delta$  7.47 (dd,  $J = 8.2, 2.0$  Hz, 2H), 7.42 (d,  $J = 8.5$  Hz, 1H), 7.21 – 7.16 (m, 2H), 7.00 (d,  $J = 2.3$  Hz, 1H), 6.94 – 6.86 (m, 2H), 3.86 (s, 3H), 2.39 (s, 3H).  $^{13}\text{C}$  NMR (100 MHz,

CDCl<sub>3</sub>) δ 160.91, 157.83, 141.09, 139.96, 133.31, 131.09, 123.08, 122.85, 120.79, 114.49, 113.08, 97.40, 96.97, 81.07, 57.55, 23.45. HRMS, calculated for C<sub>18</sub>H<sub>15</sub>O<sub>2</sub> (M+H<sup>+</sup>):263.1067, found: 263.1056 (M+H<sup>+</sup>).

**6-methoxy-2-((4-methoxyphenyl)ethynyl)benzofuran**

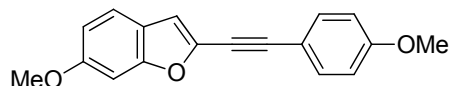

<sup>1</sup>H NMR (400 MHz, CDCl<sub>3</sub>) δ 7.55-7.49 (m, 2H), 7.42 (dd, *J* = 8.6, 1.4 Hz, 1H), 6.99 (dt, *J* = 2.3, 1.0 Hz, 1H), 6.95-6.87 (m, 4H), 3.86 (d, *J* = 1.3 Hz, 3H), 3.84 (d, *J* = 1.4 Hz, 3H). <sup>13</sup>C NMR (100 MHz, CDCl<sub>3</sub>) δ 162.02, 160.86, 157.78, 140.11, 134.99, 123.02, 122.90, 115.99, 115.90, 114.42, 112.78, 97.41, 96.82, 80.46, 57.54, 57.17. HRMS, calculated for C<sub>18</sub>H<sub>15</sub>O<sub>3</sub> (M+H<sup>+</sup>):279.1016, found: 279.0992 (M+H<sup>+</sup>).

**2-((4-chlorophenyl)ethynyl)-6-methoxybenzofuran**

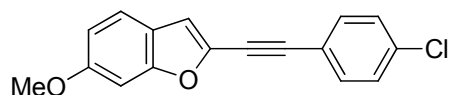

<sup>1</sup>H NMR (400 MHz, CDCl<sub>3</sub>) δ 7.53-7.46 (m, 2H), 7.43 (dd, *J* = 8.4, 1.2 Hz, 1H), 7.37-7.32 (m, 2H), 7.01-6.94 (m, 2H), 6.90 (ddd, *J* = 8.6, 2.3, 1.3 Hz, 1H), 3.86 (s, 3H). <sup>13</sup>C NMR (100 MHz, CDCl<sub>3</sub>) δ 161.13, 157.96, 139.42, 136.85, 134.52, 130.68, 123.21, 122.68, 122.40, 114.68, 113.77, 97.38, 95.61, 82.66, 57.54. ESI-MS: 282

**2-((4-fluorophenyl)ethynyl)-6-methoxybenzofuran**

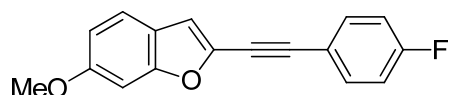

<sup>1</sup>H NMR (400 MHz, CDCl<sub>3</sub>) δ 7.55 (dddd, *J* = 7.0, 5.3, 3.3, 1.5 Hz, 2H), 7.43 (dd, *J* = 8.6, 1.6 Hz, 1H), 7.07 (ddd, *J* = 8.7, 7.7, 1.7 Hz, 2H), 7.00 (t, *J* = 2.2 Hz, 1H), 6.97-6.87 (m, 2H), 3.86 (s, 3H). <sup>13</sup>C NMR (100 MHz, CDCl<sub>3</sub>) δ 165.97, 163.48, 161.05, 157.90, 139.58, 135.33, 123.16, 122.72, 117.80, 114.61, 113.46, 97.39, 95.62, 81.42, 57.54. HRMS, calculated for C<sub>17</sub>H<sub>12</sub>FO<sub>2</sub> (M+H<sup>+</sup>):267.0810, found: 267.0804 (M+H<sup>+</sup>).

**2-((4-(tert-butyl)phenyl)ethynyl)-6-methoxybenzofuran**

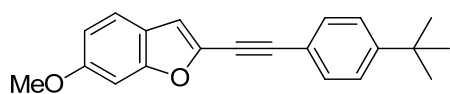

<sup>1</sup>H NMR (400 MHz, CDCl<sub>3</sub>) δ 7.54-7.48 (m, 2H), 7.45-7.37 (m, 3H), 7.01-6.98 (m, 1H), 6.94-6.87 (m, 2H), 3.86 (s, 3H), 1.33 (s, 9H). <sup>13</sup>C NMR (100 MHz, CDCl<sub>3</sub>) δ 160.91, 157.83, 154.18, 139.99, 133.15,

127.33, 123.08, 122.87, 120.83, 114.48, 113.11, 97.40, 96.97, 81.07, 57.55, 36.75, 33.00. HRMS, calculated for  $C_{21}H_{21}O_2$  ( $M+H^+$ ):305.1536, found: 305.1521 ( $M+H^+$ ).

**5-chloro-2-(phenylethynyl)benzofuran**

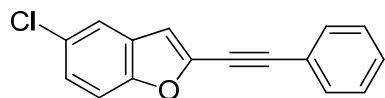

$^1H$  NMR (400 MHz,  $CDCl_3$ )  $\delta$  7.62-7.51 (m, 3H), 7.39 (dd,  $J = 8.8, 3.4$  Hz, 4H), 7.34-7.27 (m, 1H), 6.94 (s, 1H).  $^{13}C$  NMR (100 MHz,  $CDCl_3$ )  $\delta$  155.06, 142.07, 133.59, 131.23, 130.95, 130.80, 130.40, 127.62, 123.41, 122.50, 114.03, 112.81, 97.56, 81.09. ESI-MS: 252

**5-chloro-2-(p-tolyethynyl)benzofuran**

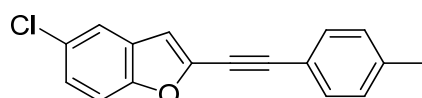

$^1H$  NMR (400 MHz,  $CDCl_3$ )  $\delta$  7.53 (d,  $J = 2.1$  Hz, 1H), 7.47 (d,  $J = 8.0$  Hz, 2H), 7.38 (d,  $J = 8.7$  Hz, 1H), 7.28 (dd,  $J = 8.7, 2.2$  Hz, 1H), 7.19 (d,  $J = 7.9$  Hz, 2H), 6.92 (s, 1H), 2.39 (s, 3H).  $^{13}C$  NMR (100 MHz,  $CDCl_3$ )  $\delta$  155.00, 142.26, 141.61, 133.49, 131.14, 131.00, 130.72, 127.46, 122.41, 120.28, 113.98, 112.42, 97.79, 80.41, 23.48. HRMS, calculated for  $C_{17}H_{12}ClO$  ( $M+H^+$ ):267.0571, found: 267.0575 ( $M+H^+$ ). ESI-MS: 264

**5-chloro-2-((4-methoxyphenyl)ethynyl)benzofuran**

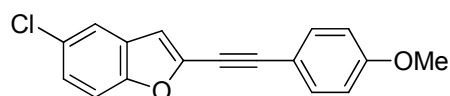

$^1H$  NMR (400 MHz,  $CDCl_3$ )  $\delta$  7.55-7.49 (m, 3H), 7.38 (dt,  $J = 8.8, 0.7$  Hz, 1H), 7.30-7.25 (m, 1H), 6.93-6.87 (m, 3H), 3.84 (s, 3H).  $^{13}C$  NMR (100 MHz,  $CDCl_3$ )  $\delta$  162.32, 154.95, 142.41, 135.20, 131.06, 130.68, 127.35, 122.35, 116.05, 115.35, 113.93, 112.11, 97.71, 79.86, 57.19. HRMS, calculated for  $C_{17}H_{12}ClO_2$  ( $M+H^+$ ):283.0520, found: 283.0523 ( $M+H^+$ ).

**5-chloro-2-((4-chlorophenyl)ethynyl)benzofuran**

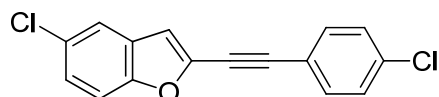

$^1H$  NMR (400 MHz,  $CDCl_3$ )  $\delta$  7.62-7.47 (m, 4H), 7.43-7.26 (m, 3H), 6.95 (s, 1H).  $^{13}C$  NMR (100 MHz,  $CDCl_3$ )  $\delta$  155.09, 141.71, 137.38, 134.72, 130.87, 130.81, 130.77, 127.77, 122.54, 121.86, 114.05, 113.07, 96.32, 81.91.

**5-chloro-2-((4-fluorophenyl)ethynyl)benzofuran**



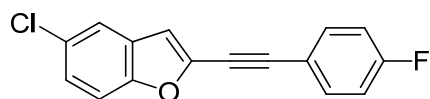

$^1\text{H}$  NMR (400 MHz,  $\text{CDCl}_3$ )  $\delta$  7.57 (ddt,  $J = 11.1, 5.0, 2.4$  Hz, 3H), 7.44-7.34 (m, 1H), 7.34-7.24 (m, 1H), 7.15-7.04 (m, 2H), 6.94 (d,  $J = 2.9$  Hz, 1H).  $^{13}\text{C}$  NMR (100 MHz,  $\text{CDCl}_3$ )  $\delta$  166.21, 163.71, 155.04, 141.86, 135.65, 130.82, 127.66, 122.49, 119.52, 117.69, 114.02, 112.80, 96.38, 80.75.

### 2-((4-(tert-butyl)phenyl)ethynyl)-5-chlorobenzofuran

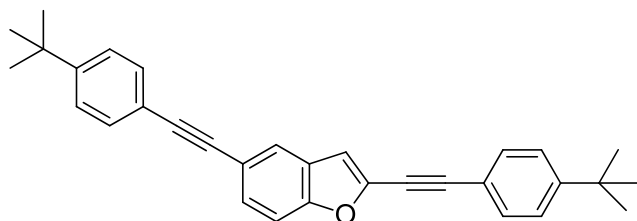

$^1\text{H}$  NMR (400 MHz,  $\text{CDCl}_3$ )  $\delta$  7.56 – 7.49 (m, 3H), 7.47 (d,  $J = 8.1$  Hz, 2H), 7.44 – 7.39 (m, 3H), 7.36 (t,  $J = 6.3$  Hz, 3H), 7.29 (s, 1H), 6.92 (s, 1H), 1.34 (s, 9H), 1.32 (s, 9H).  $^{13}\text{C}$  NMR (100 MHz,  $\text{CDCl}_3$ )  $\delta$  155.01, 154.69, 154.40, 142.30, 134.11, 133.36, 131.03, 130.73, 127.46, 127.41, 127.32, 122.41, 120.69, 120.33, 113.98, 112.46, 97.81, 83.38, 80.43, 75.37, 36.79, 36.76, 32.98, 32.96. HRMS, calculated for  $\text{C}_{32}\text{H}_{31}\text{O}$  ( $\text{M}+\text{H}^+$ ): 431.2369, found: 431.2369 ( $\text{M}+\text{H}^+$ ).

### 2-(phenylethynyl)naphtho[2,1-b]furan

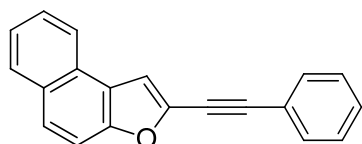

$^1\text{H}$  NMR (400 MHz,  $\text{CDCl}_3$ )  $\delta$  8.13 (dd,  $J = 8.0, 1.2$  Hz, 1H), 7.98 – 7.93 (m, 1H), 7.79 (d,  $J = 8.9$  Hz, 1H), 7.67 – 7.59 (m, 4H), 7.56 – 7.49 (m, 2H), 7.40 (dp,  $J = 4.8, 1.8$  Hz, 3H).  $^{13}\text{C}$  NMR (100 MHz,  $\text{CDCl}_3$ )  $\delta$  154.56, 140.03, 133.45, 132.31, 130.91, 130.68, 130.37, 129.22, 128.59, 128.54, 126.77, 125.27, 125.04, 123.85, 114.02, 112.53, 97.04, 81.76. HRMS, calculated for  $\text{C}_{20}\text{H}_{13}\text{O}$  ( $\text{M}+\text{H}^+$ ): 269.0961, found: 269.0952 ( $\text{M}+\text{H}^+$ ).

### 2-(p-tolyethynyl)naphtho[2,1-b]furan

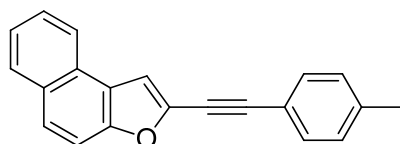

$^1\text{H}$  NMR (400 MHz,  $\text{CDCl}_3$ )  $\delta$  8.16 – 8.10 (m, 1H), 7.95 (d,  $J = 8.1$  Hz, 1H), 7.78 (d,  $J = 8.9$  Hz, 1H), 7.67 – 7.58 (m, 2H), 7.55 – 7.47 (m, 4H), 7.24 – 7.18 (m, 2H), 2.40 (s, 3H).  $^{13}\text{C}$  NMR (100 MHz,  $\text{CDCl}_3$ )  $\delta$  154.47, 141.23, 140.23, 133.37, 132.29, 131.13, 130.65, 129.20, 128.48, 128.43, 126.72,

125.27, 125.08, 120.73, 114.01, 112.19, 97.26, 81.11, 23.48. HRMS, calculated for  $C_{21}H_{14}NaO_2$  (M+Na):305.0937, found: 305.0926 (M+Na).

**2-((4-methoxyphenyl)ethynyl)naphtho[2,1-b]furan**

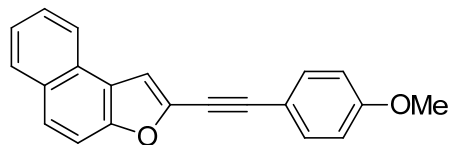

$^1H$  NMR (400 MHz,  $CDCl_3$ )  $\delta$  8.12 (d,  $J = 8.2$  Hz, 1H), 7.94 (d,  $J = 8.3$  Hz, 1H), 7.77 (d,  $J = 8.9$  Hz, 1H), 7.67-7.45 (m, 6H), 6.97-6.88 (m, 2H), 3.85 (s, 3H).  $^{13}C$  NMR (100 MHz,  $CDCl_3$ )  $\delta$  162.10, 154.40, 140.38, 135.07, 132.29, 130.65, 129.19, 128.45, 128.32, 126.70, 125.27, 125.11, 116.04, 115.83, 113.99, 111.89, 97.12, 80.52, 57.19. HRMS, calculated for  $C_{21}H_{15}O_2$  (M+H $^+$ ):299.1067, found: 299.1060 (M+H $^+$ ).

**2-((4-chlorophenyl)ethynyl)naphtho[2,1-b]furan**

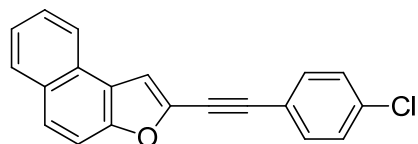

$^1H$  NMR (400 MHz,  $CDCl_3$ )  $\delta$  8.12 (d,  $J = 8.1$  Hz, 1H), 7.95 (d,  $J = 8.1$  Hz, 1H), 7.79 (d,  $J = 8.8$  Hz, 1H), 7.68-7.58 (m, 2H), 7.53 (dd,  $J = 8.8, 2.1$  Hz, 4H), 7.41-7.35 (m, 2H).  $^{13}C$  NMR (100 MHz,  $CDCl_3$ )  $\delta$  154.64, 139.68, 136.99, 134.59, 132.31, 130.74, 130.68, 129.19, 128.77, 128.60, 126.83, 125.23, 124.96, 122.32, 113.98, 112.83, 95.88, 82.68. HRMS, calculated for  $C_{20}H_{12}ClO$  (M+H $^+$ ):303.0571, found: 303.0573 (M+H $^+$ ).

**2-((4-fluorophenyl)ethynyl)naphtho[2,1-b]furan**

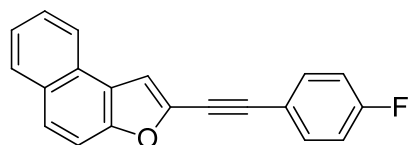

$^1H$  NMR (400 MHz,  $CDCl_3$ )  $\delta$  8.12 (d,  $J = 8.0$  Hz, 1H), 7.95 (d,  $J = 8.0$  Hz, 1H), 7.78 (d,  $J = 8.9$  Hz, 1H), 7.60 (dddd,  $J = 14.3, 6.7, 3.5, 2.1$  Hz, 4H), 7.55-7.47 (m, 2H), 7.14-7.04 (m, 2H).  $^{13}C$  NMR (100 MHz,  $CDCl_3$ )  $\delta$  166.05, 163.55, 154.57, 139.84, 135.49, 135.40, 132.31, 130.67, 129.20, 128.64, 128.55, 126.79, 125.24, 117.64, 113.98, 112.55, 95.90, 81.48. ESI-MS: 286

**2-((4-(tert-butyl)phenyl)ethynyl)naphtho[2,1-b]furan**

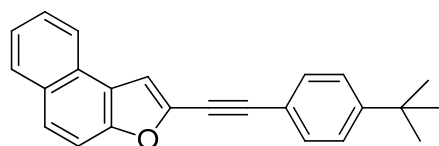

$^1\text{H}$  NMR (400 MHz,  $\text{CDCl}_3$ )  $\delta$  8.12 (d,  $J = 8.1$  Hz, 1H), 7.95 (d,  $J = 8.1$  Hz, 1H), 7.78 (d,  $J = 9.0$  Hz, 1H), 7.68-7.59 (m, 2H), 7.59-7.47 (m, 4H), 7.46-7.39 (m, 2H), 1.35 (s, 9H).  $^{13}\text{C}$  NMR (100 MHz,  $\text{CDCl}_3$ )  $\delta$  154.47, 154.32, 140.26, 133.24, 132.30, 130.66, 129.21, 128.49, 128.44, 127.40, 126.73, 125.28, 125.09, 120.78, 114.01, 112.23, 97.29, 81.14, 36.78, 33.02. HRMS, calculated for  $\text{C}_{24}\text{H}_{21}\text{O}$  ( $\text{M}+\text{H}^+$ ):325.1587, found: 325.1606 ( $\text{M}+\text{H}^+$ ).

**1-(benzofuran-2-yl)-2-phenylethane-1, 2-dione**

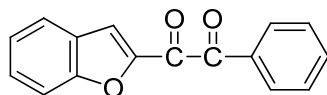

$^1\text{H}$  NMR (400 MHz,  $\text{CDCl}_3$ )  $\delta$  8.14-8.03 (m, 2H), 7.79-7.61 (m, 4H), 7.54 (tt,  $J = 7.7, 4.1$  Hz, 3H), 7.35 (dq,  $J = 7.3, 4.6, 4.0$  Hz, 1H).  $^{13}\text{C}$  NMR (100 MHz,  $\text{CDCl}_3$ )  $\delta$  193.12, 184.36, 158.48, 151.46, 136.88, 134.33, 132.10, 131.62, 130.84, 128.64, 126.26, 125.82, 121.41, 114.58. HRMS, calculated for  $\text{C}_{16}\text{H}_{10}\text{NaO}_3$  ( $\text{M}+\text{Na}^+$ ):273.0522, found: 273.0546 ( $\text{M}+\text{Na}^+$ ).

## 6. $^1\text{H}$ NMR and $^{13}\text{C}$ NMR copies of products

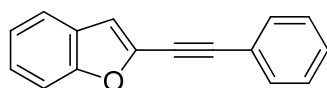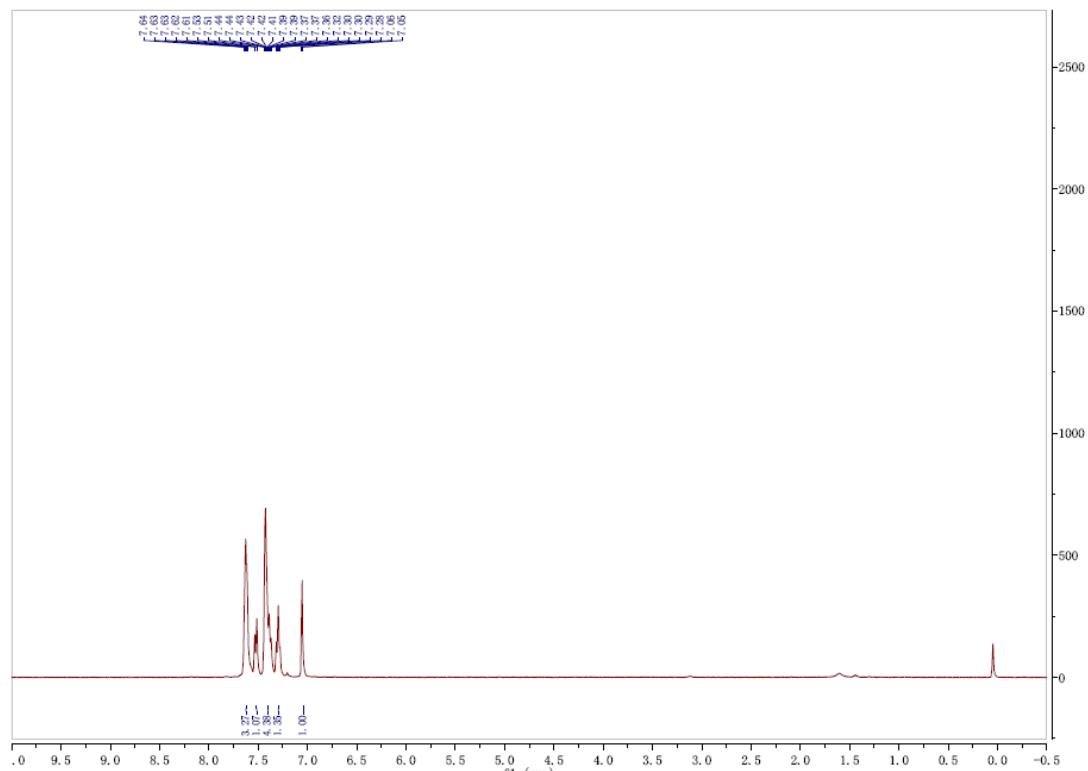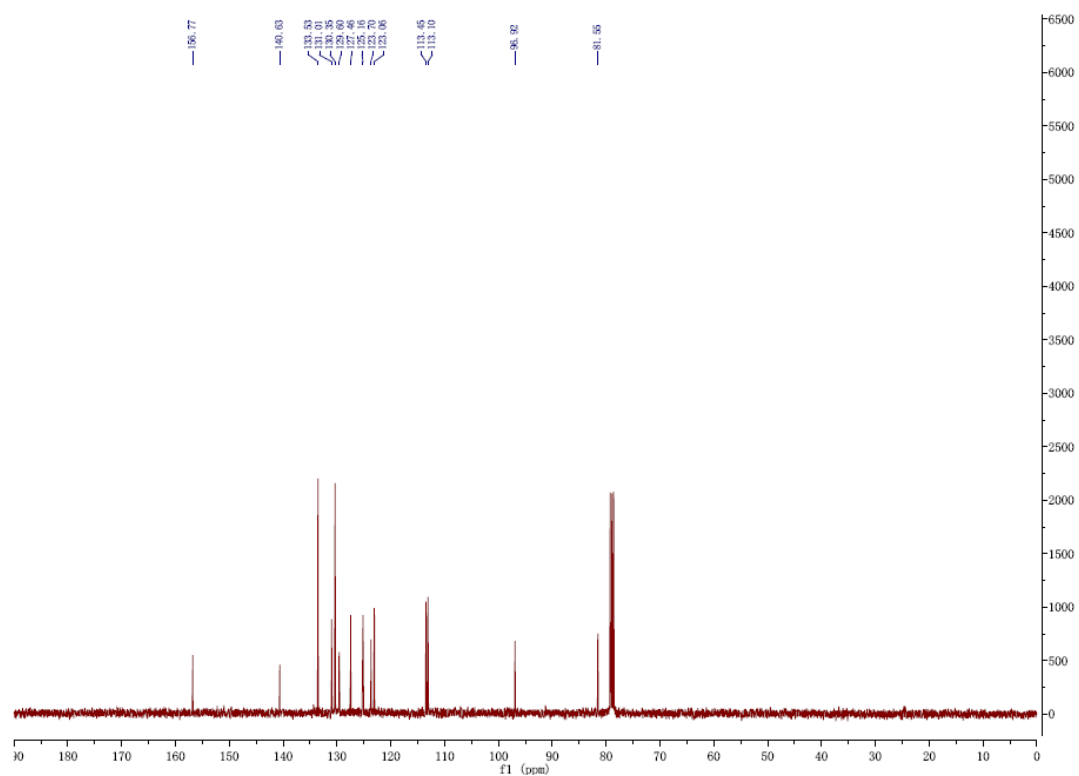

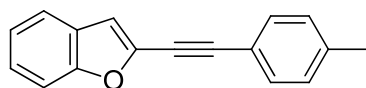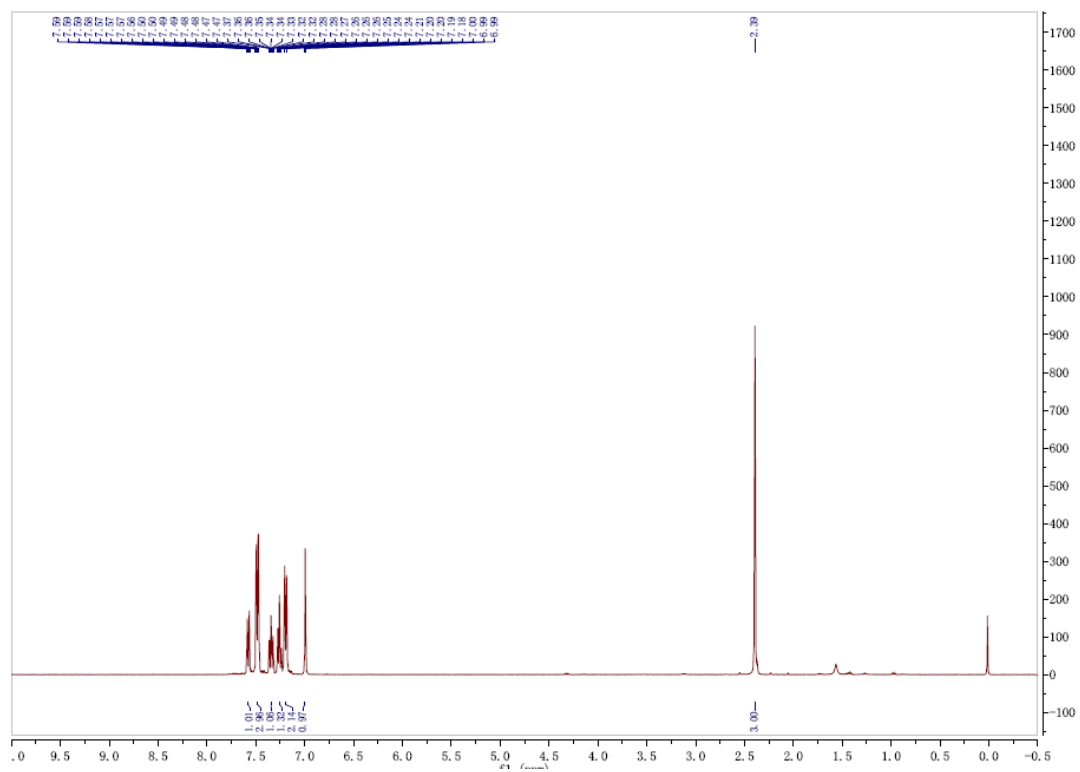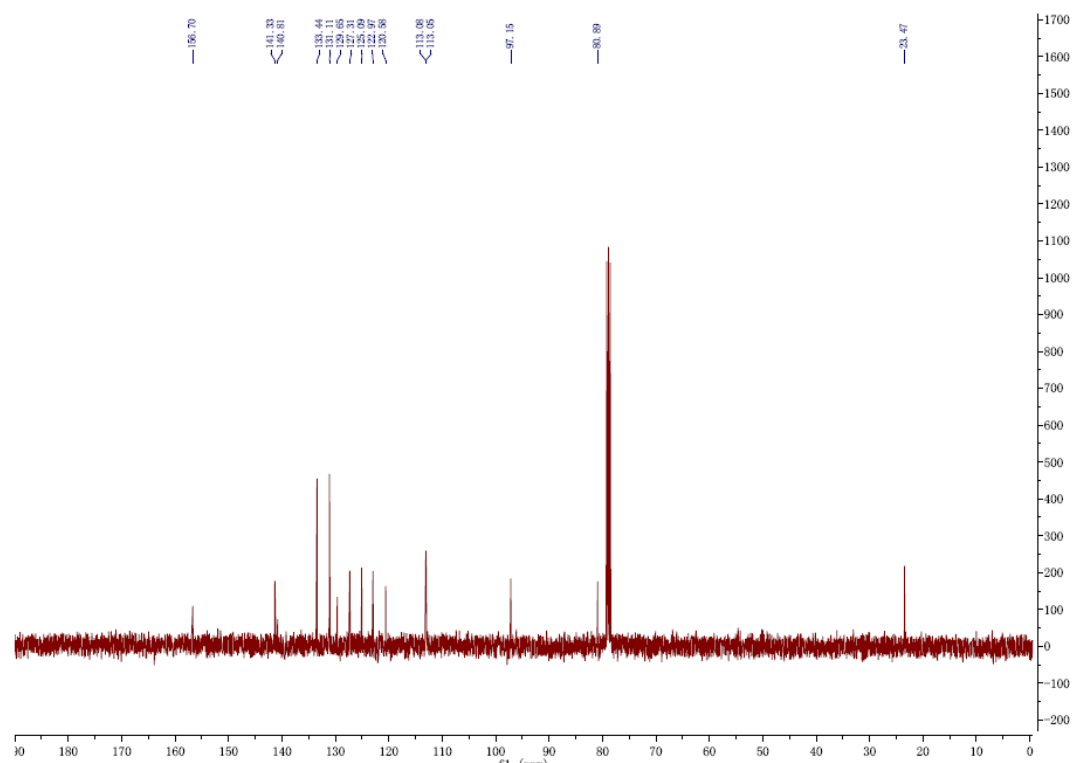

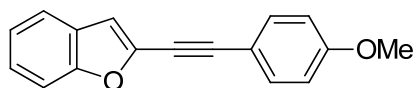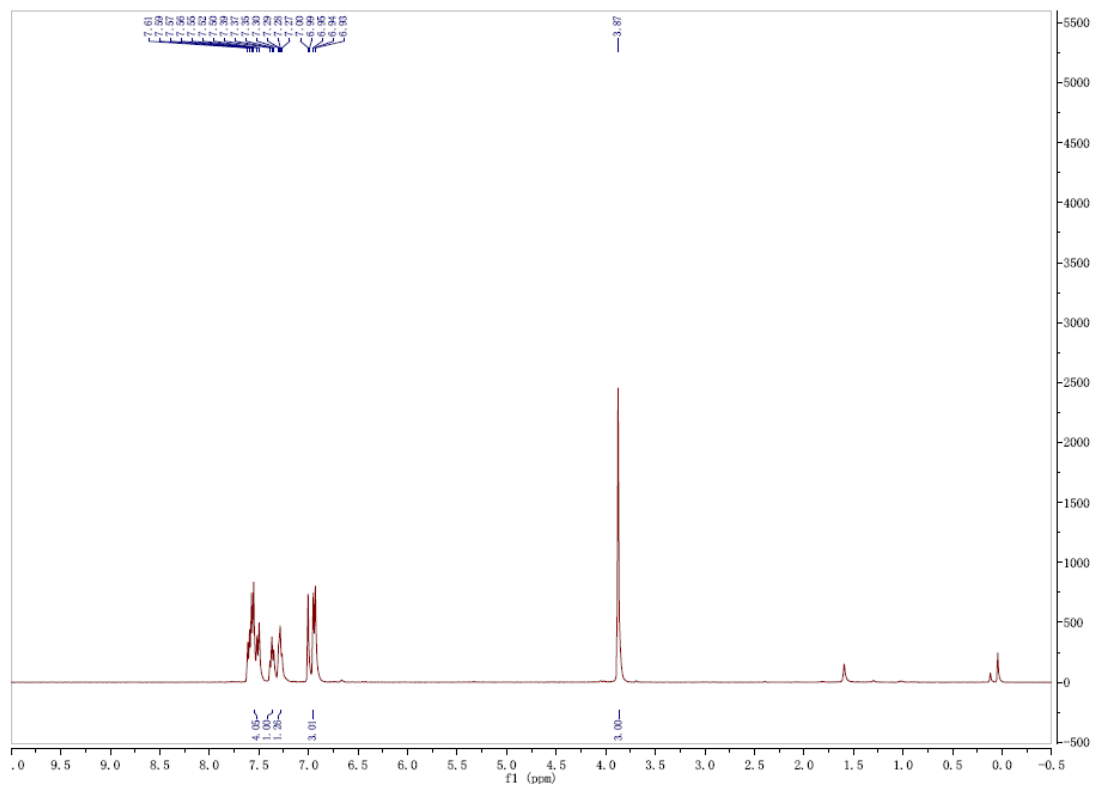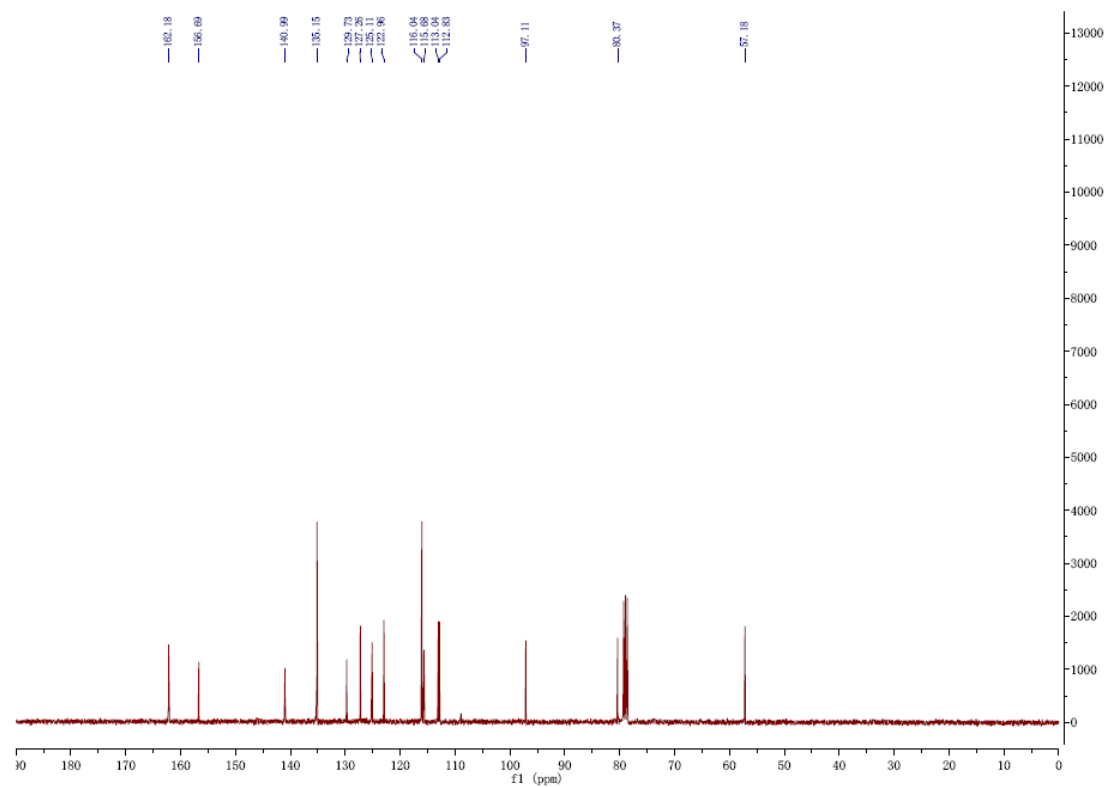







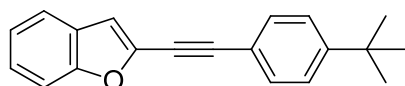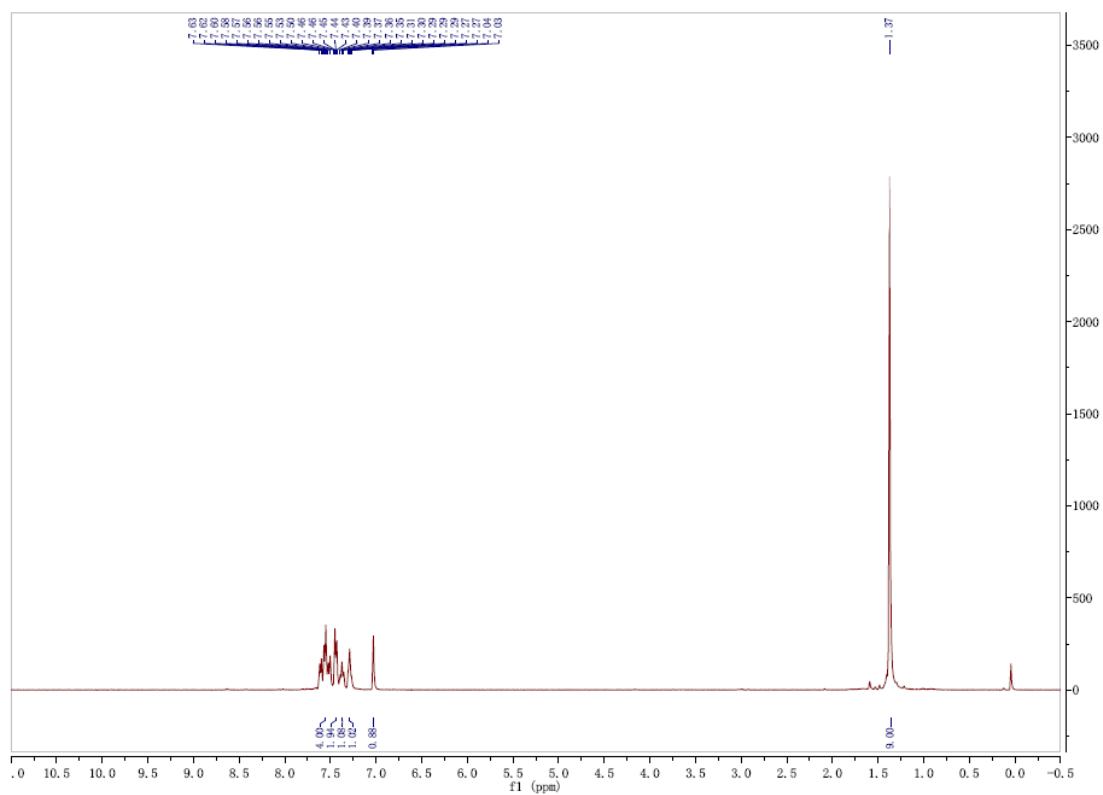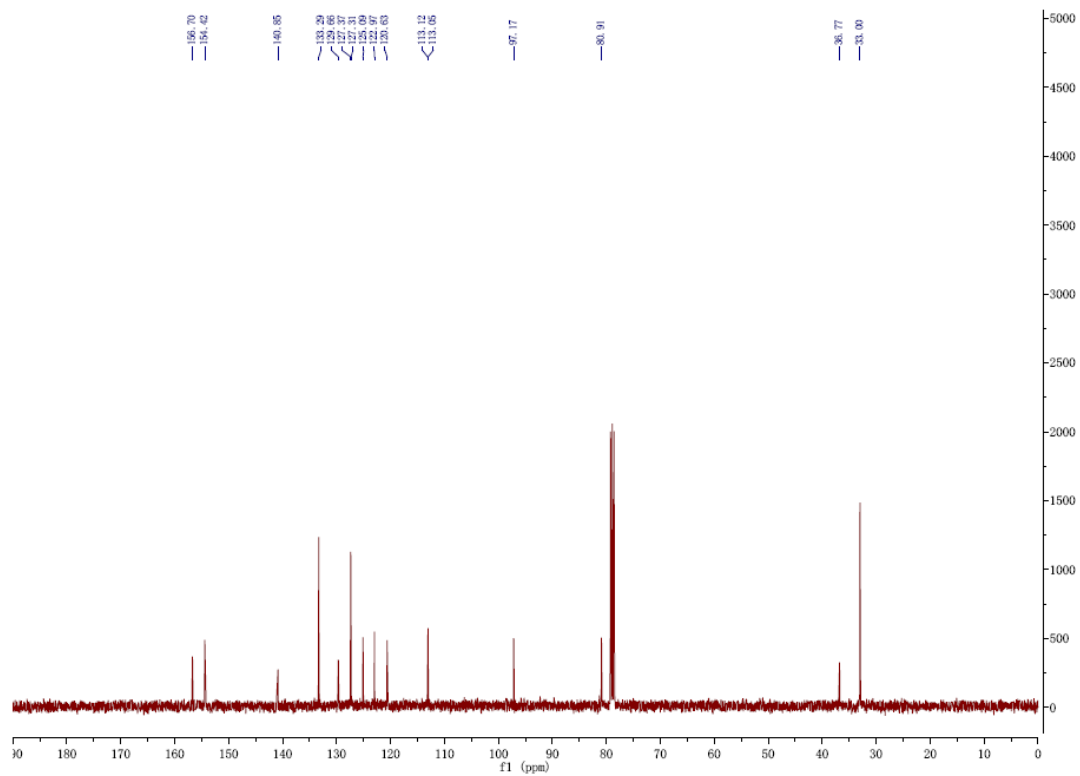

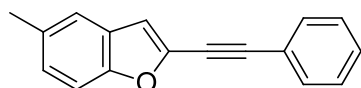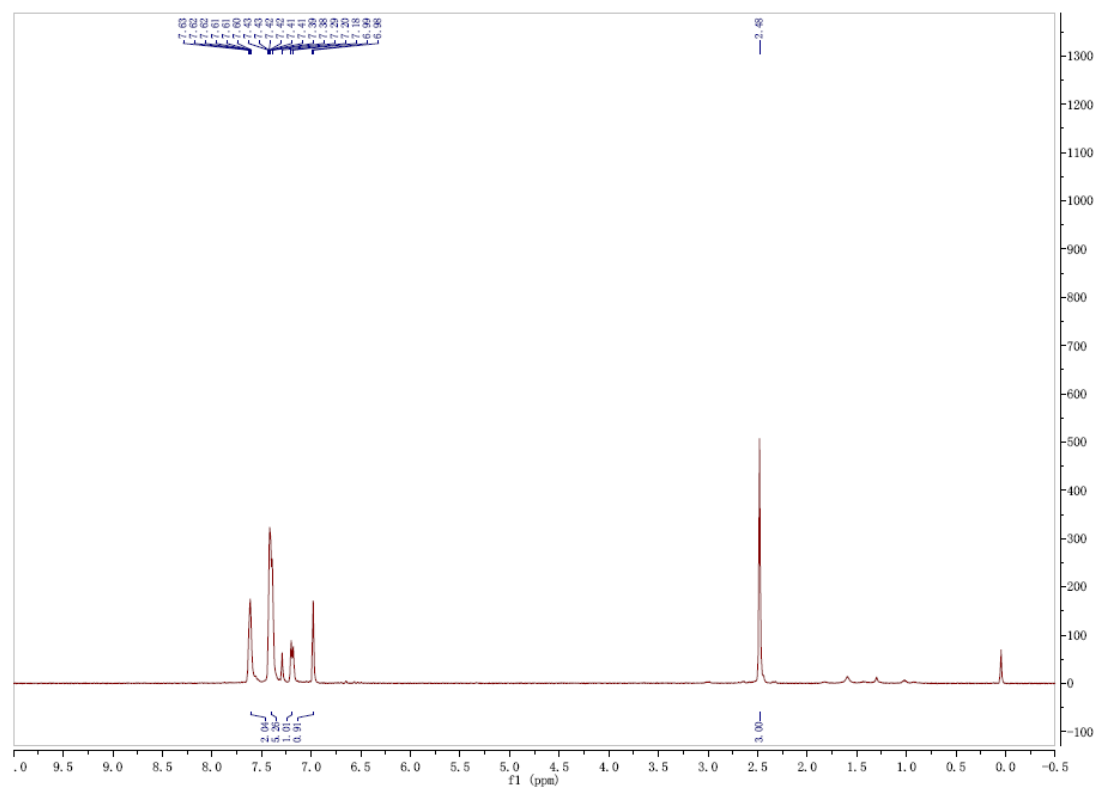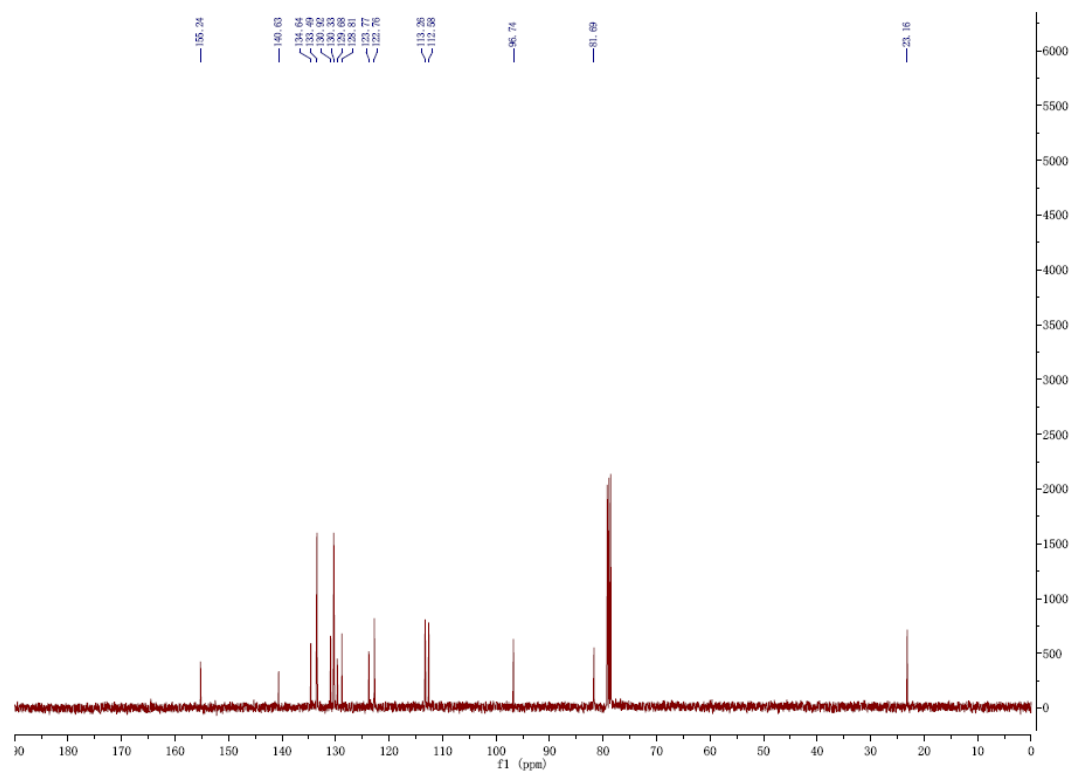

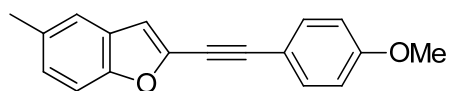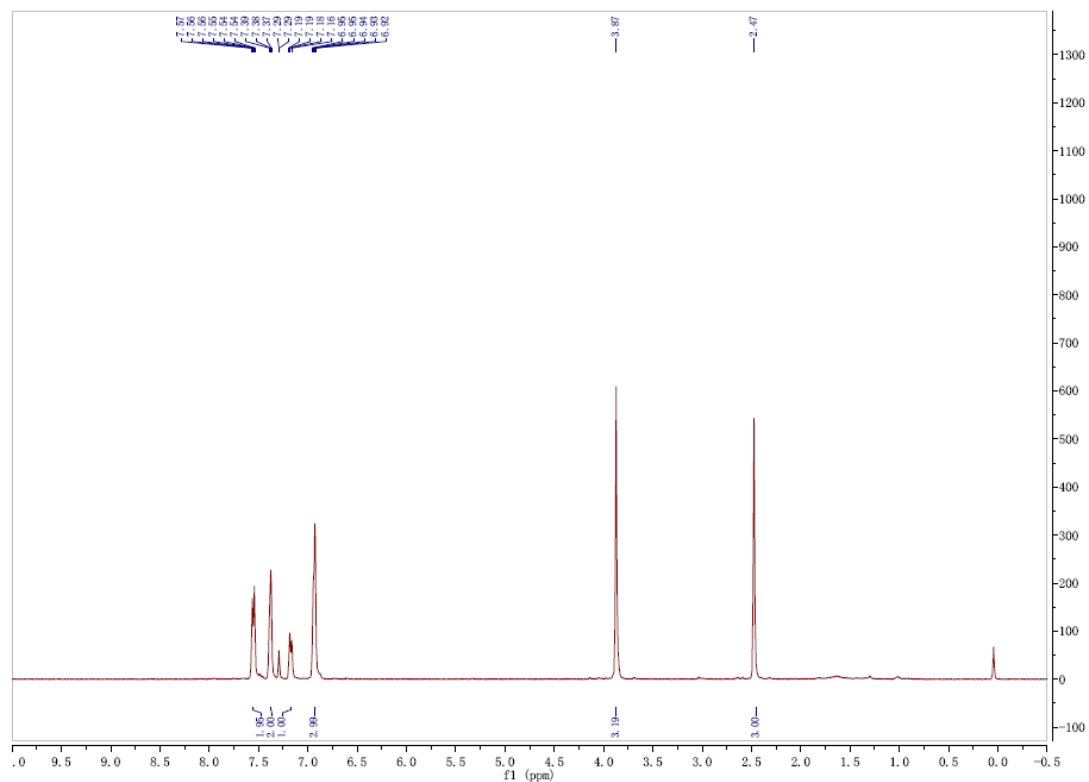

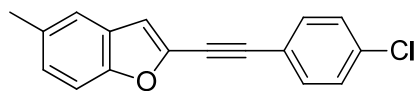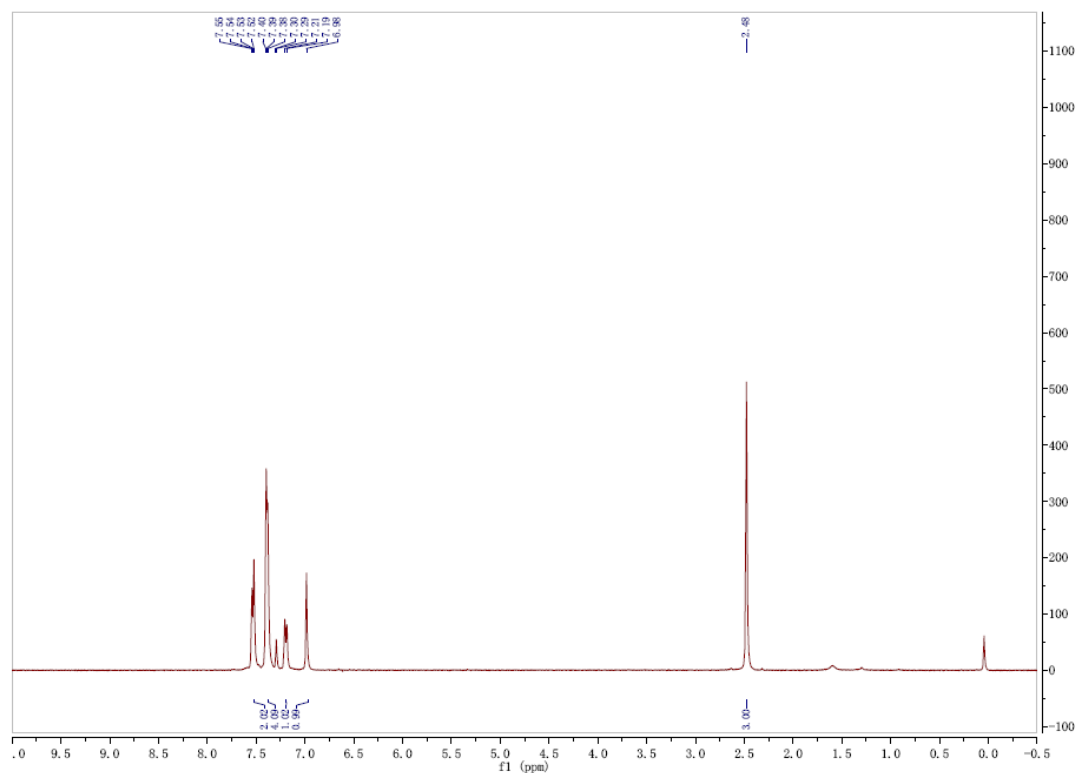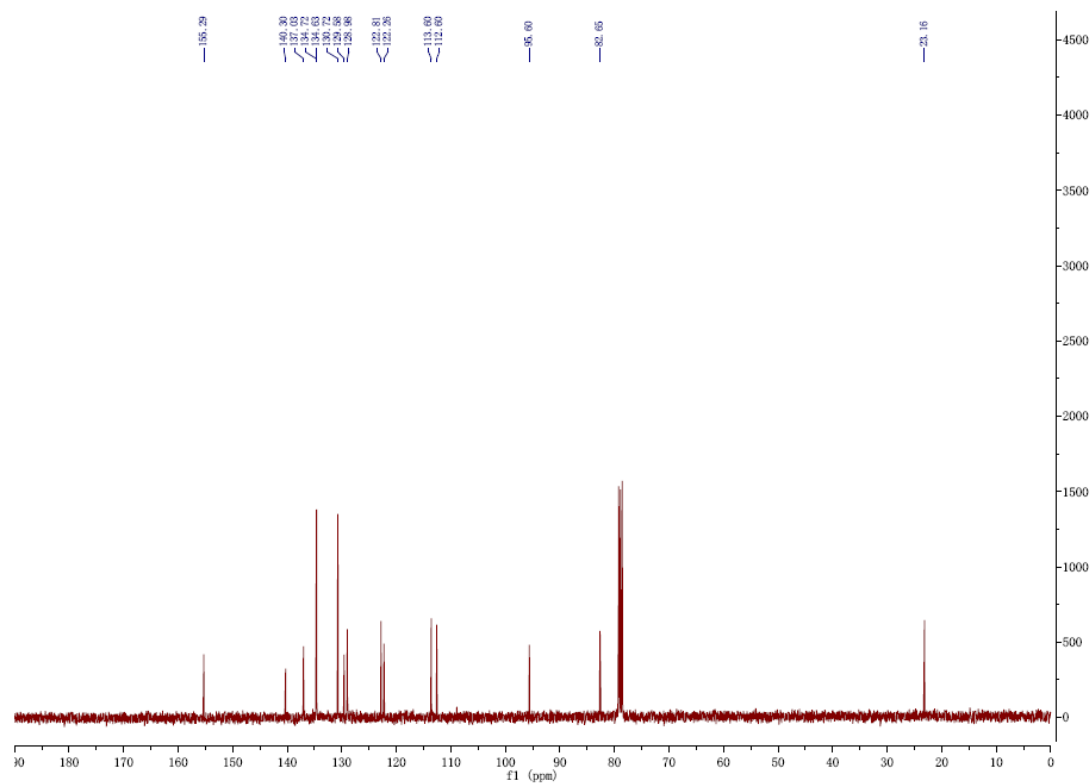

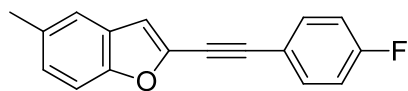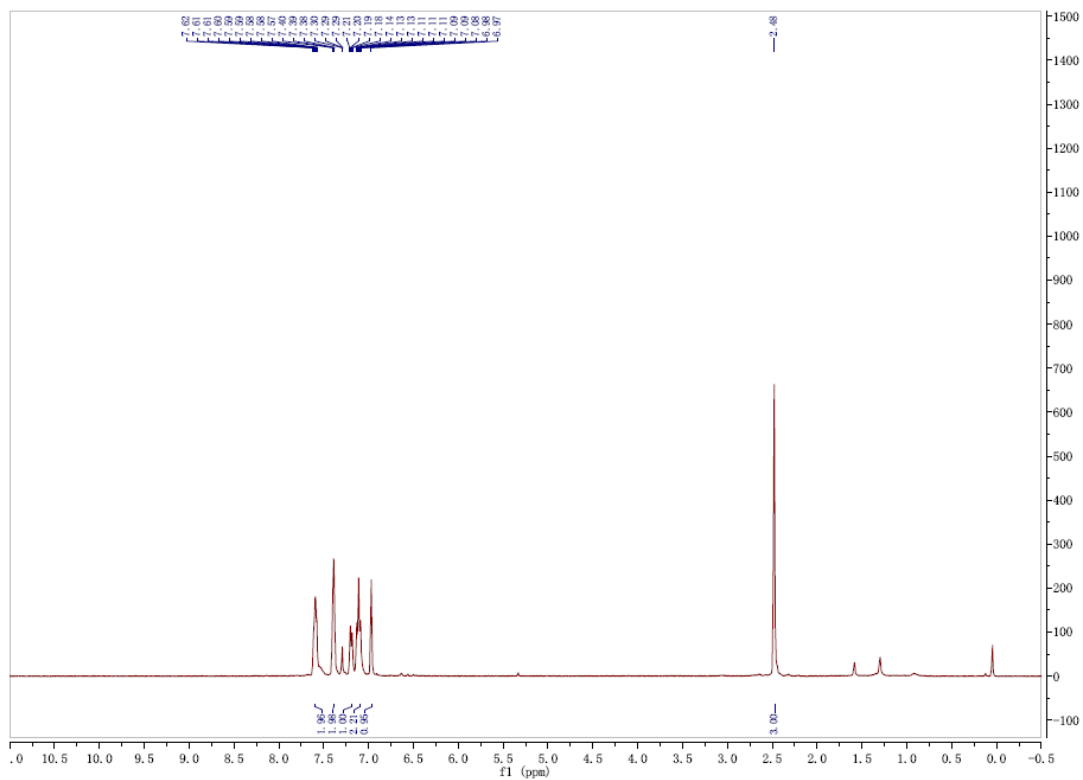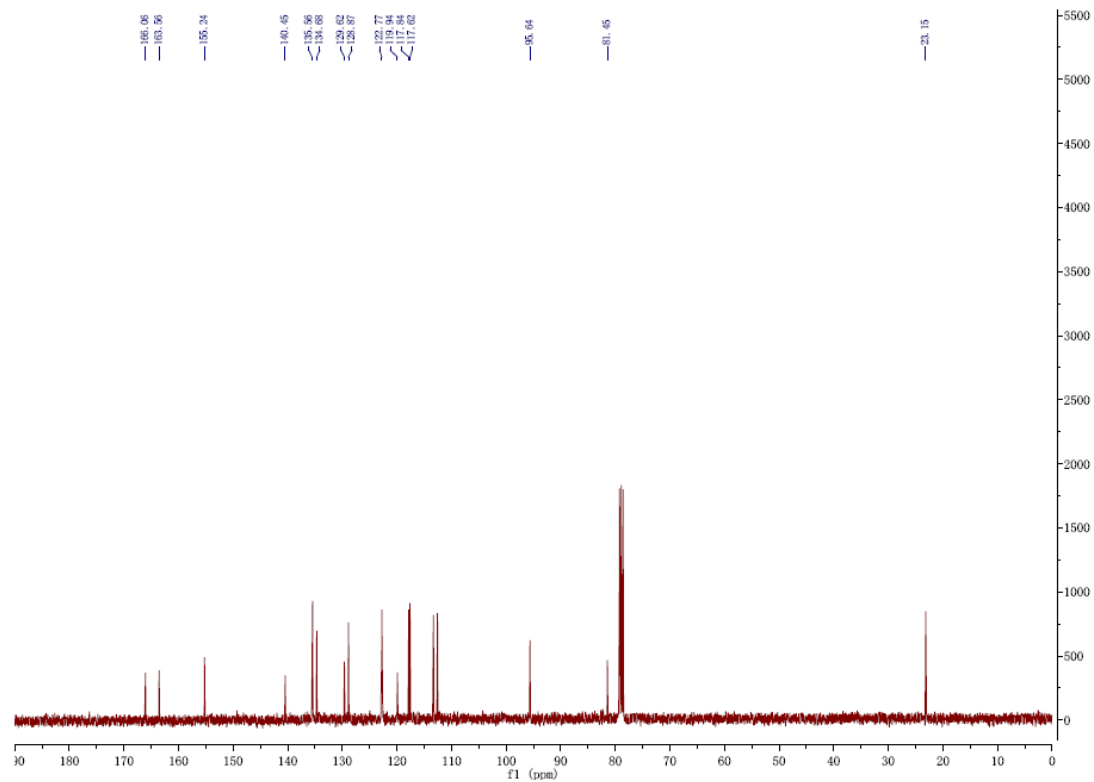

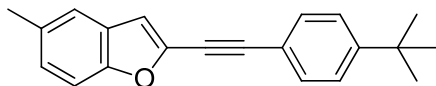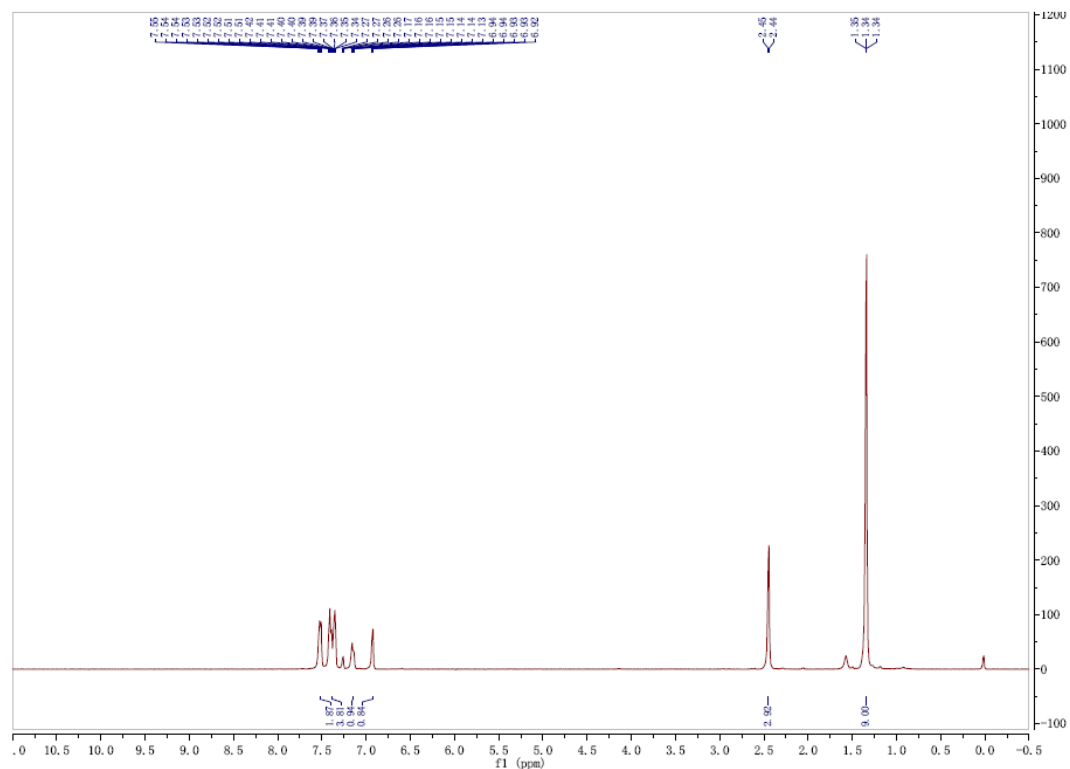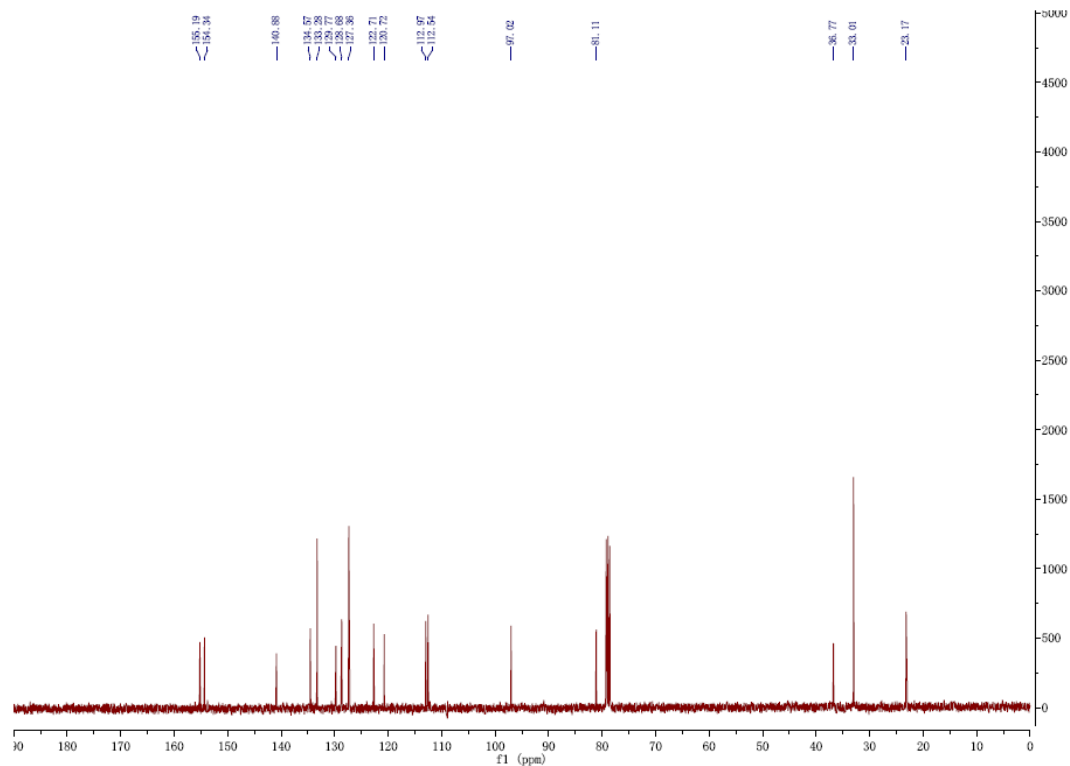

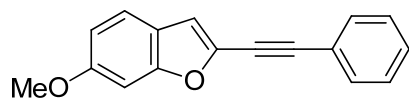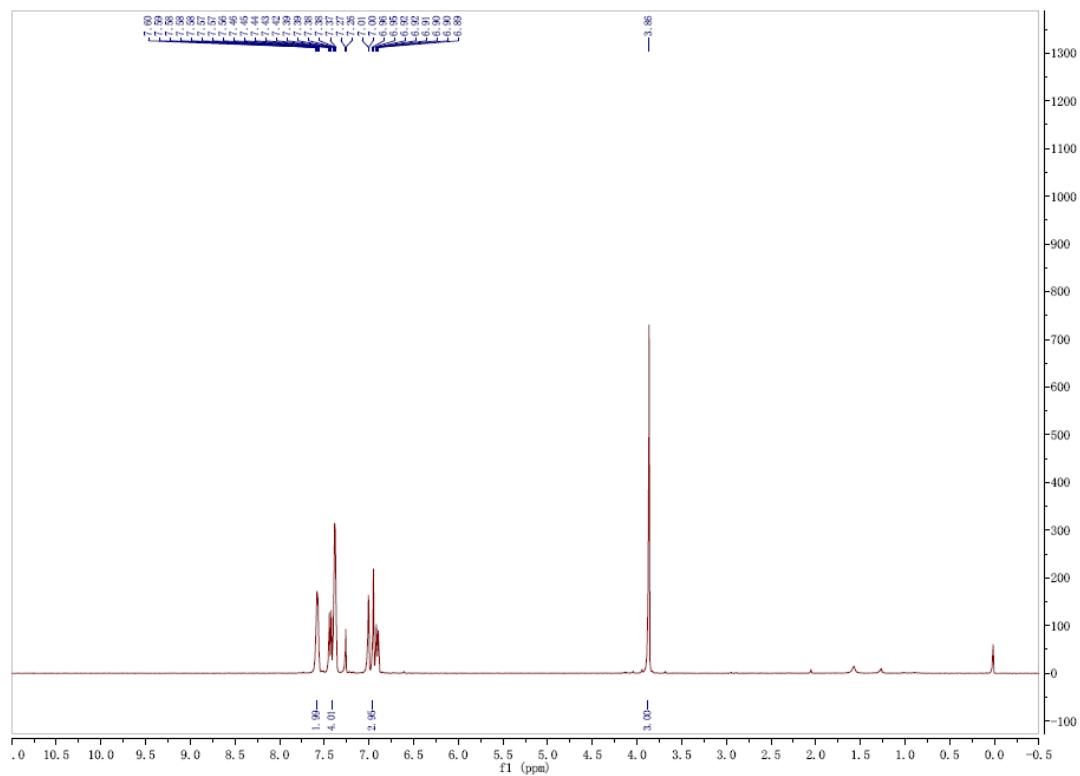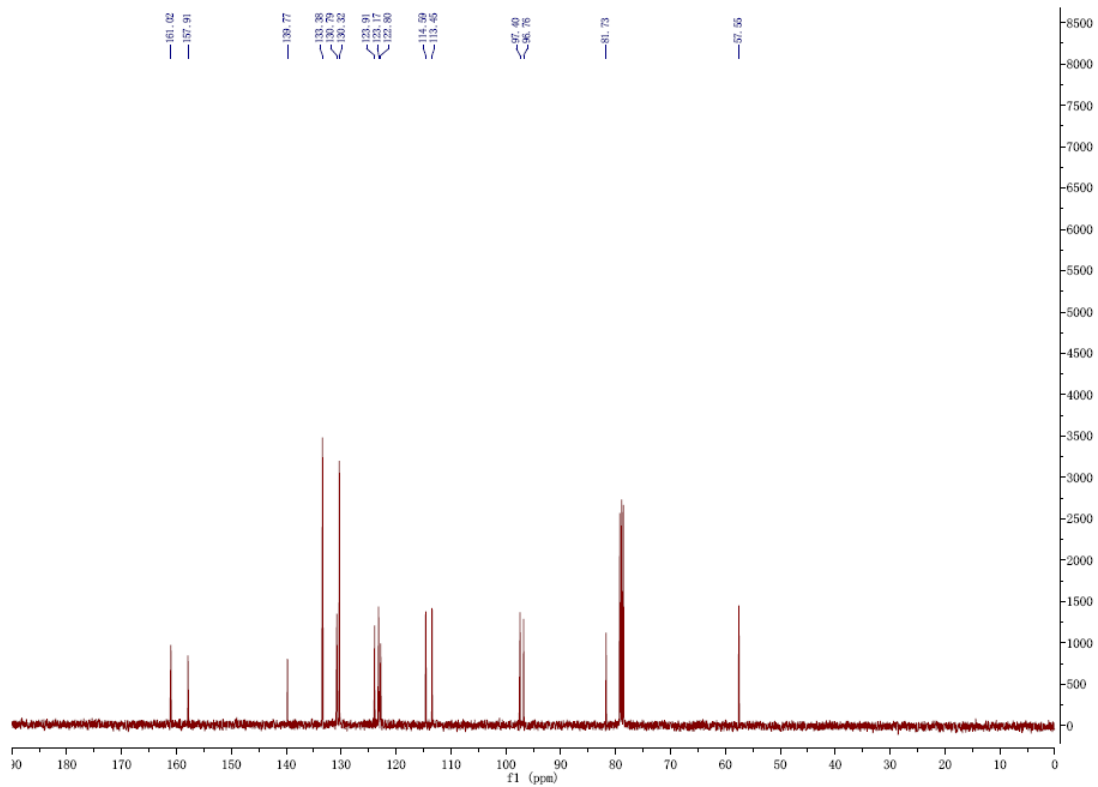

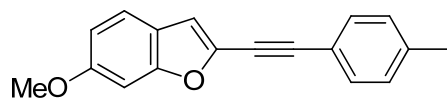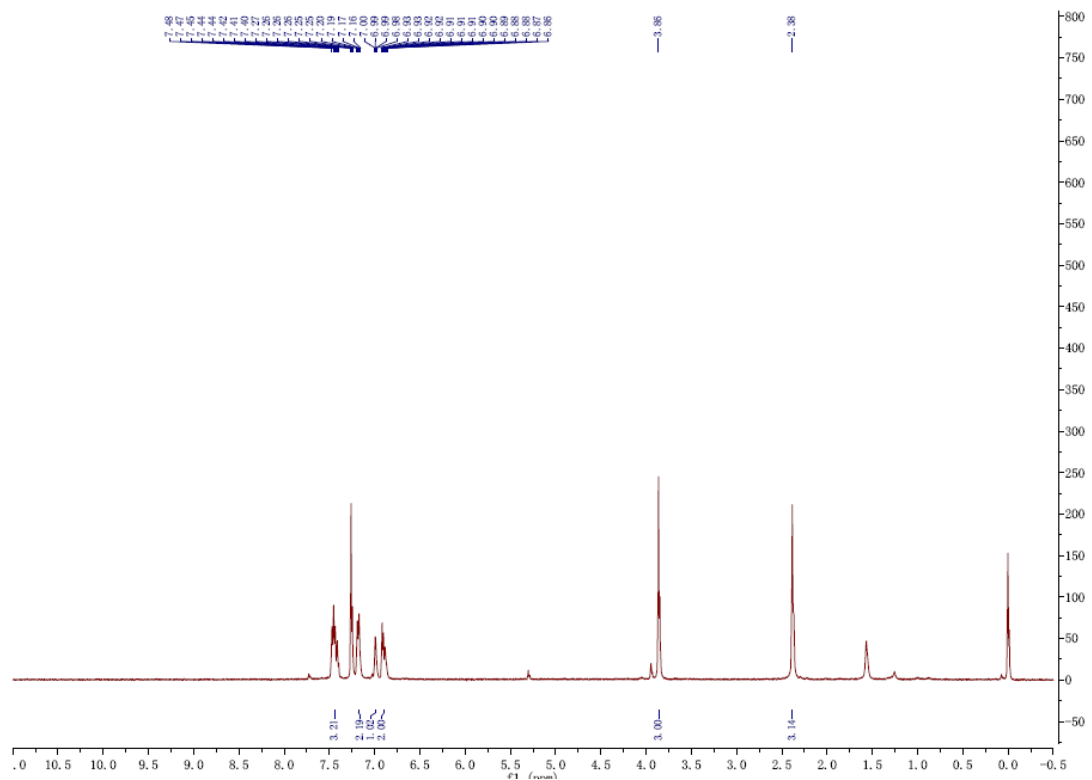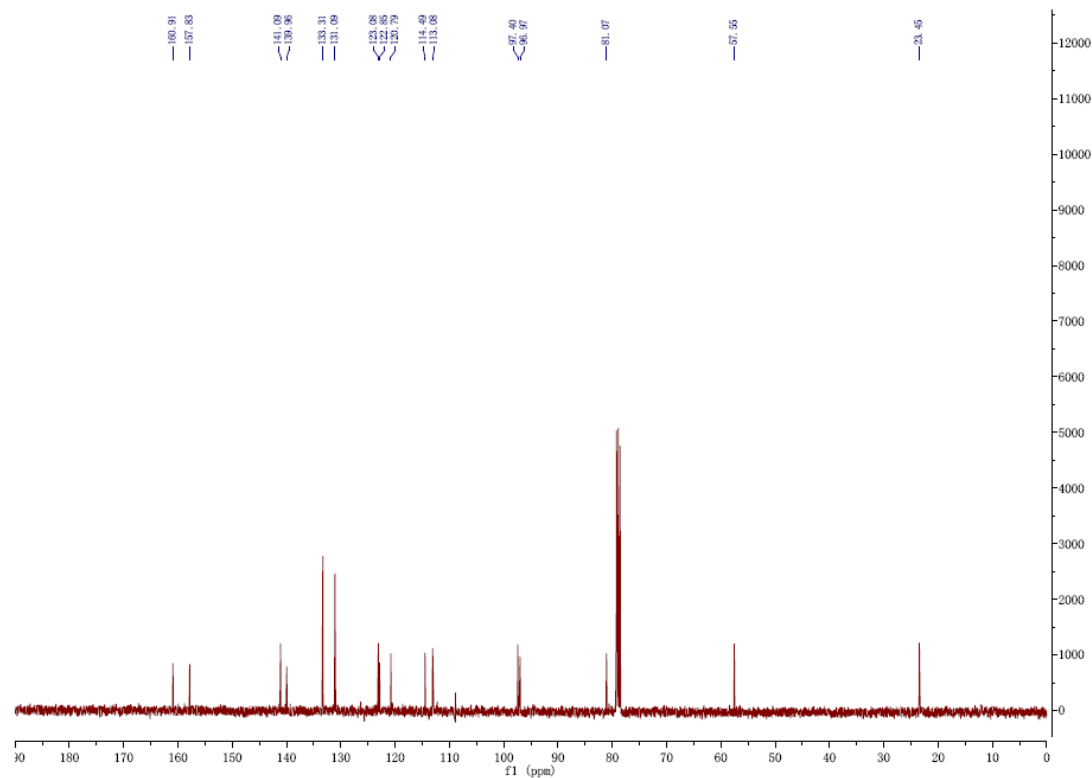



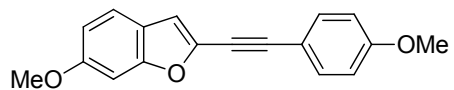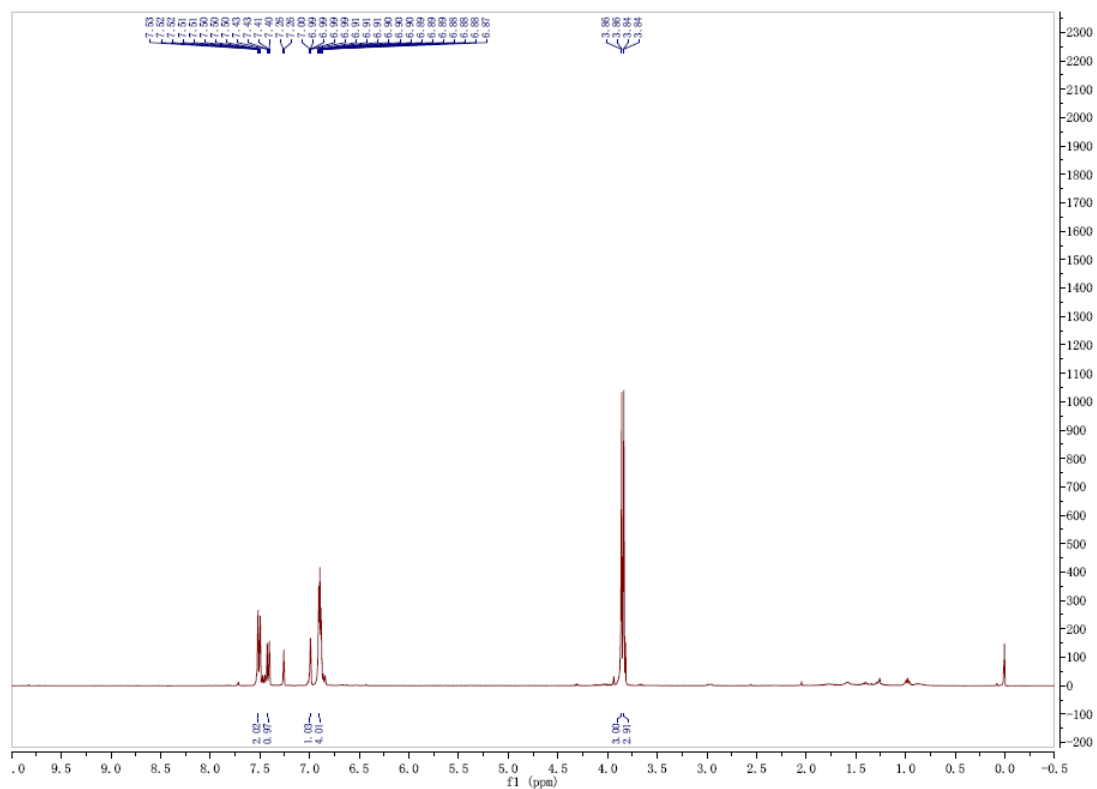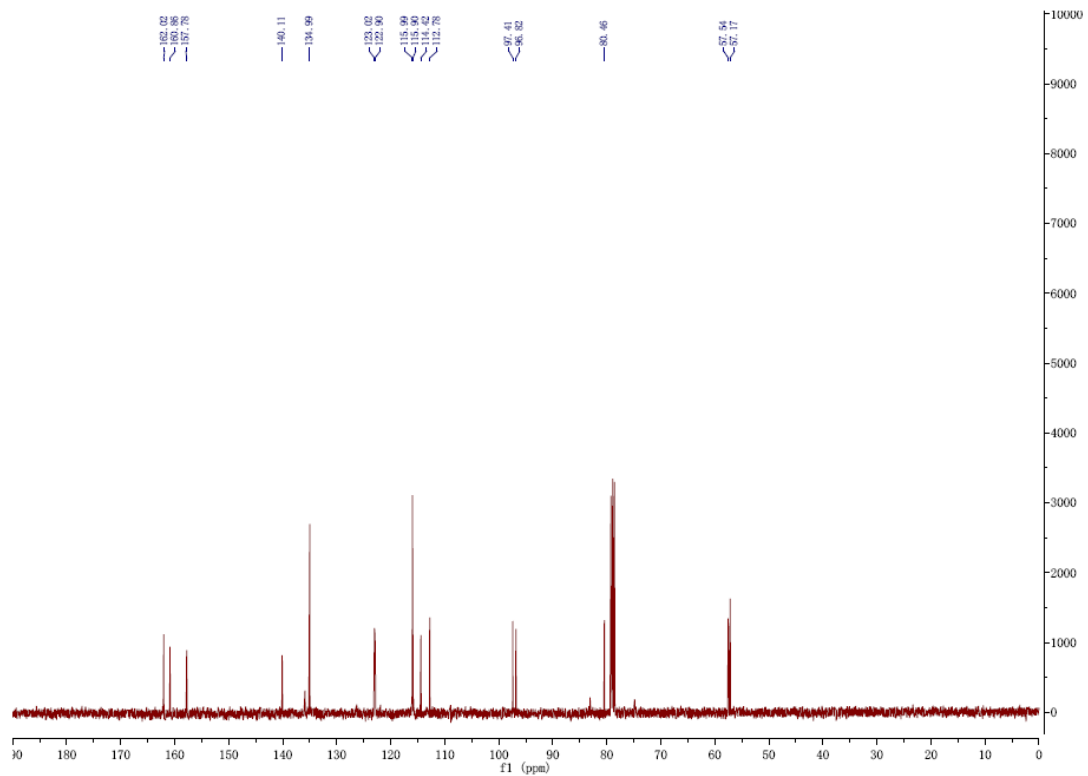



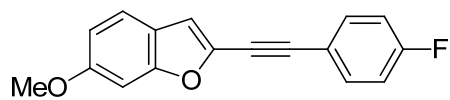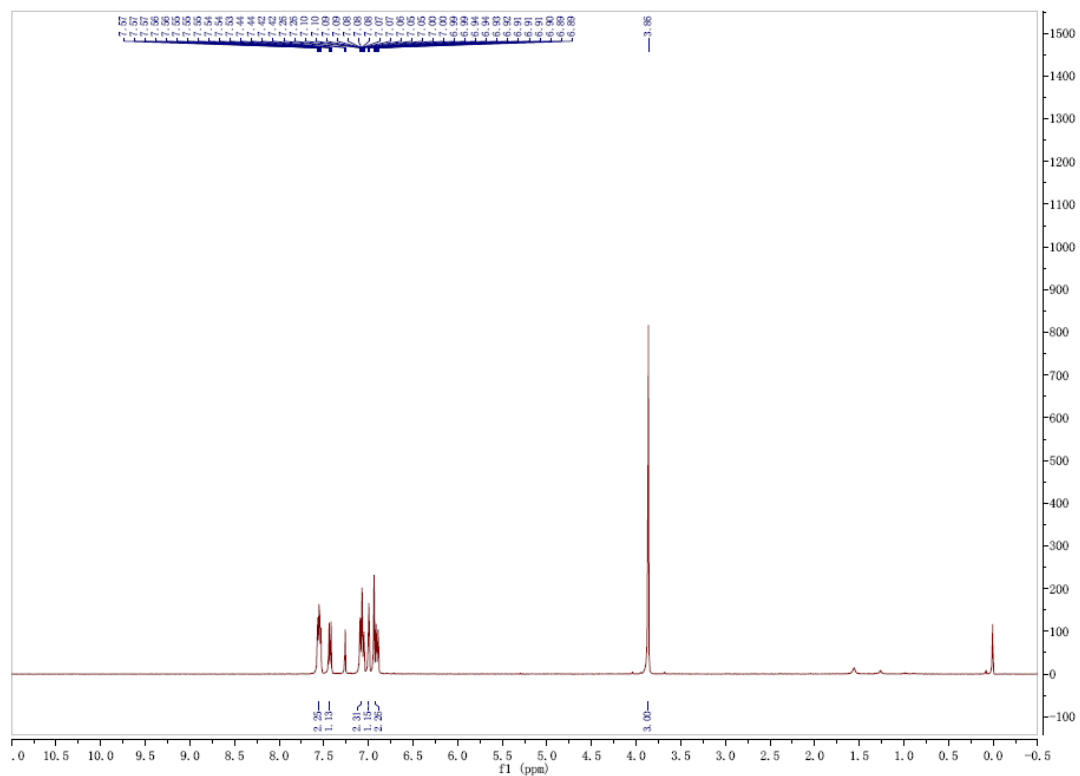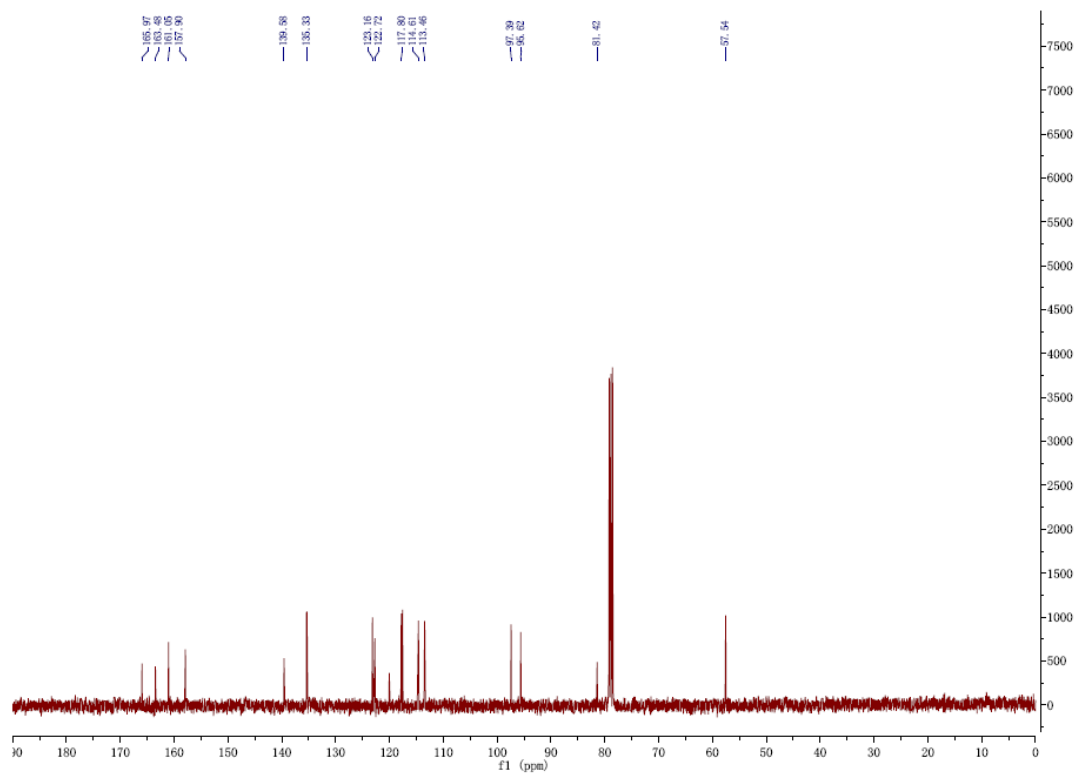

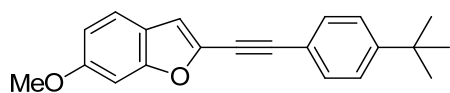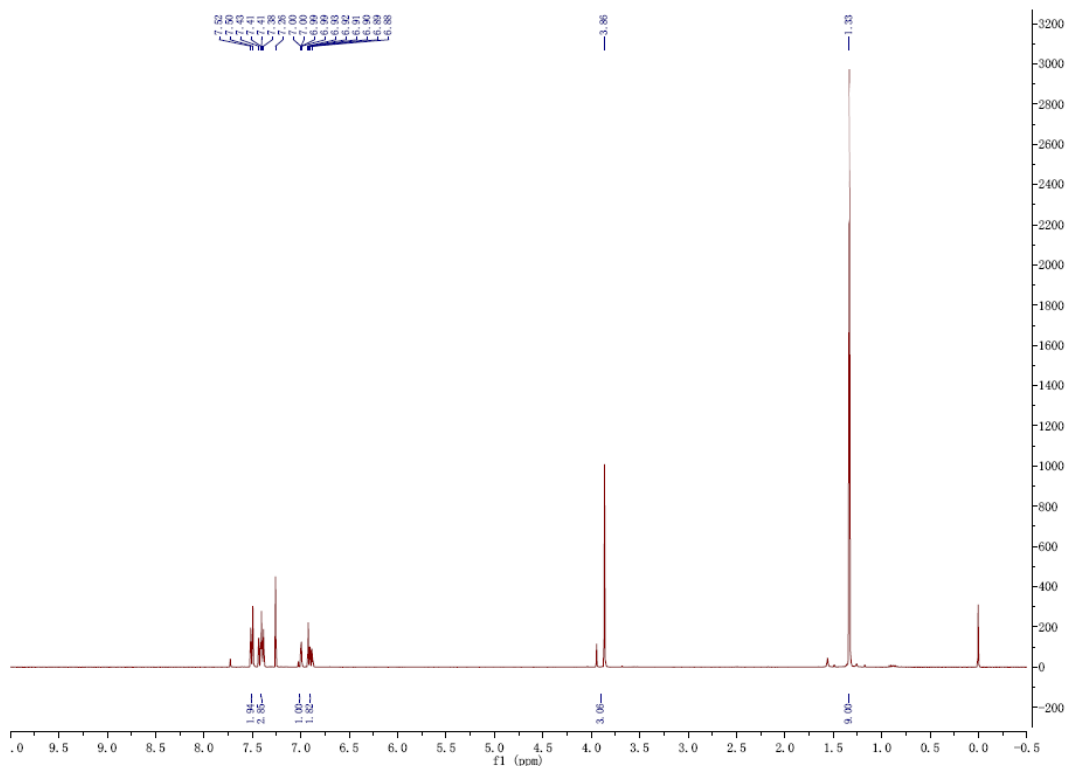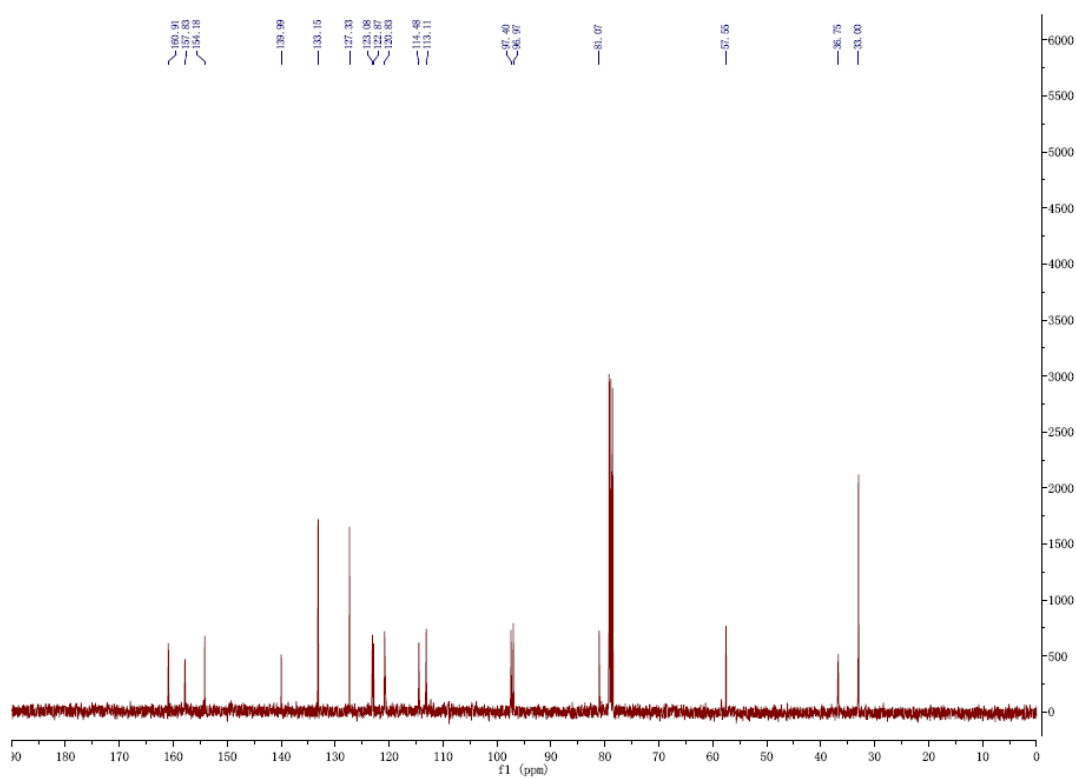



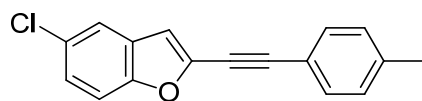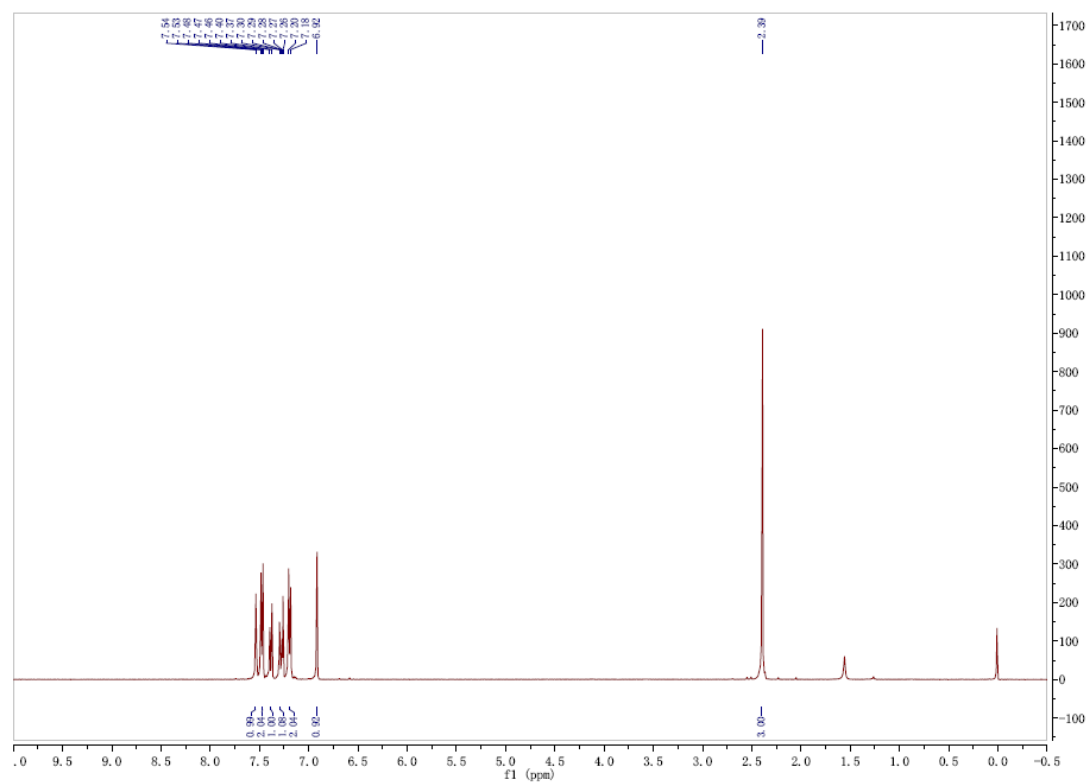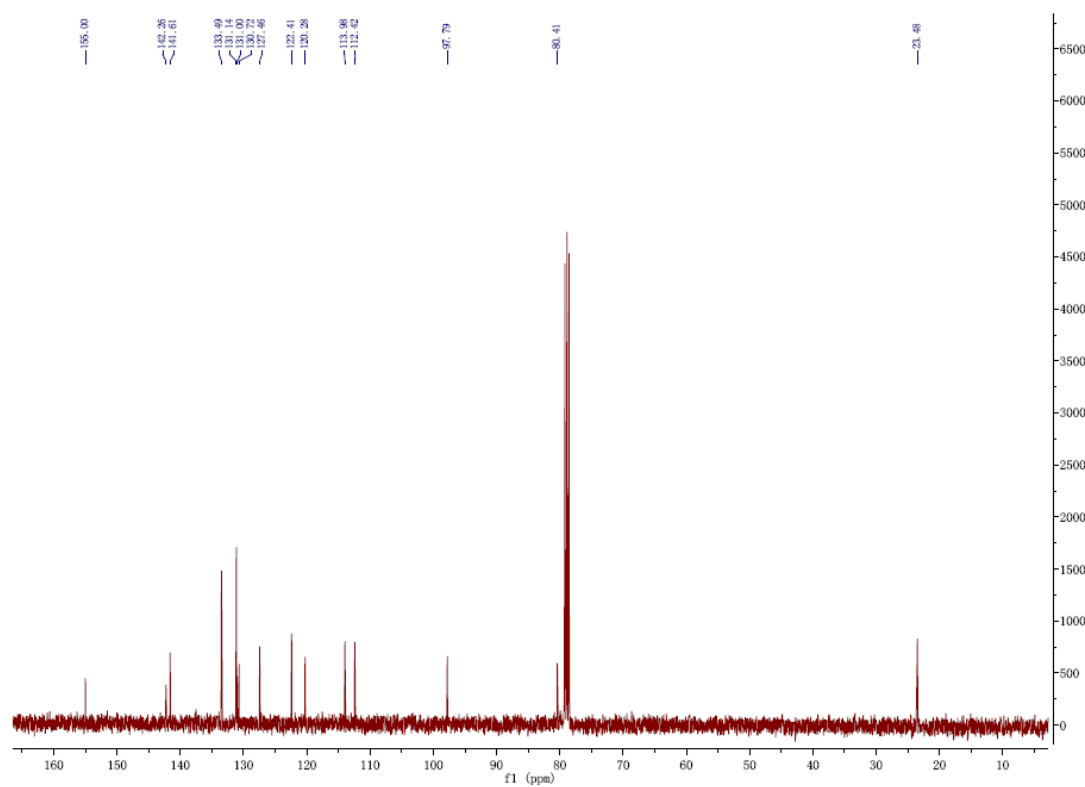

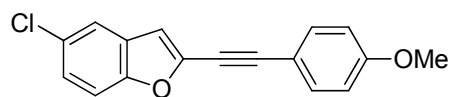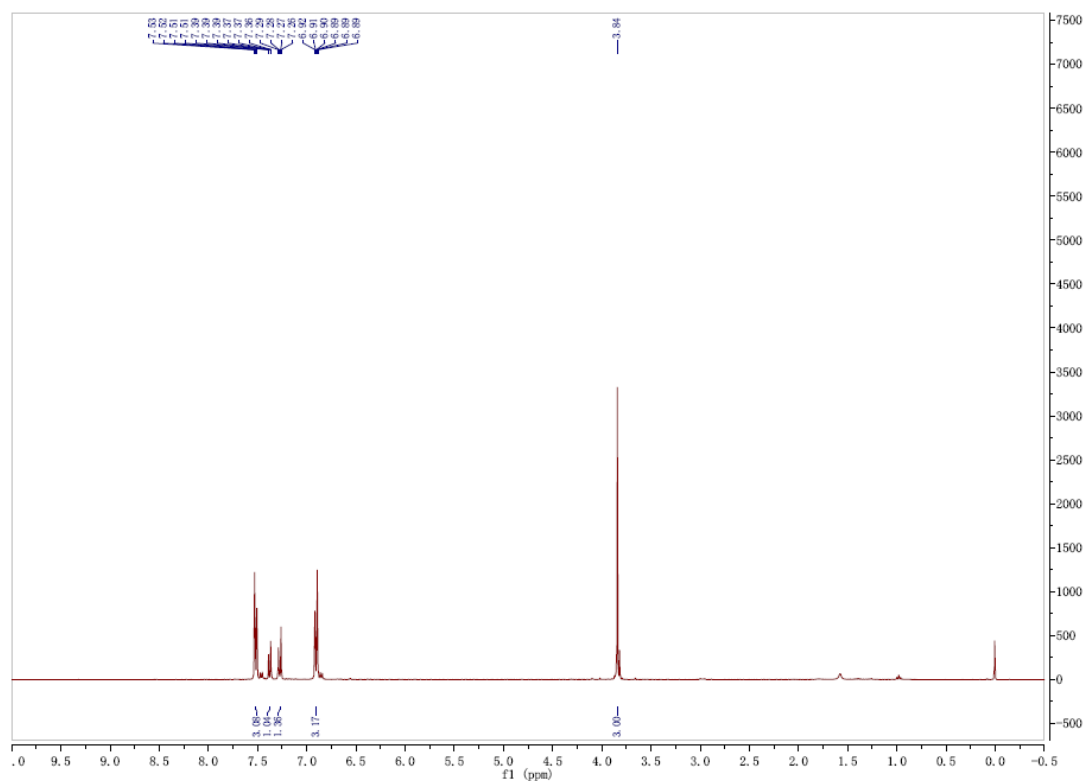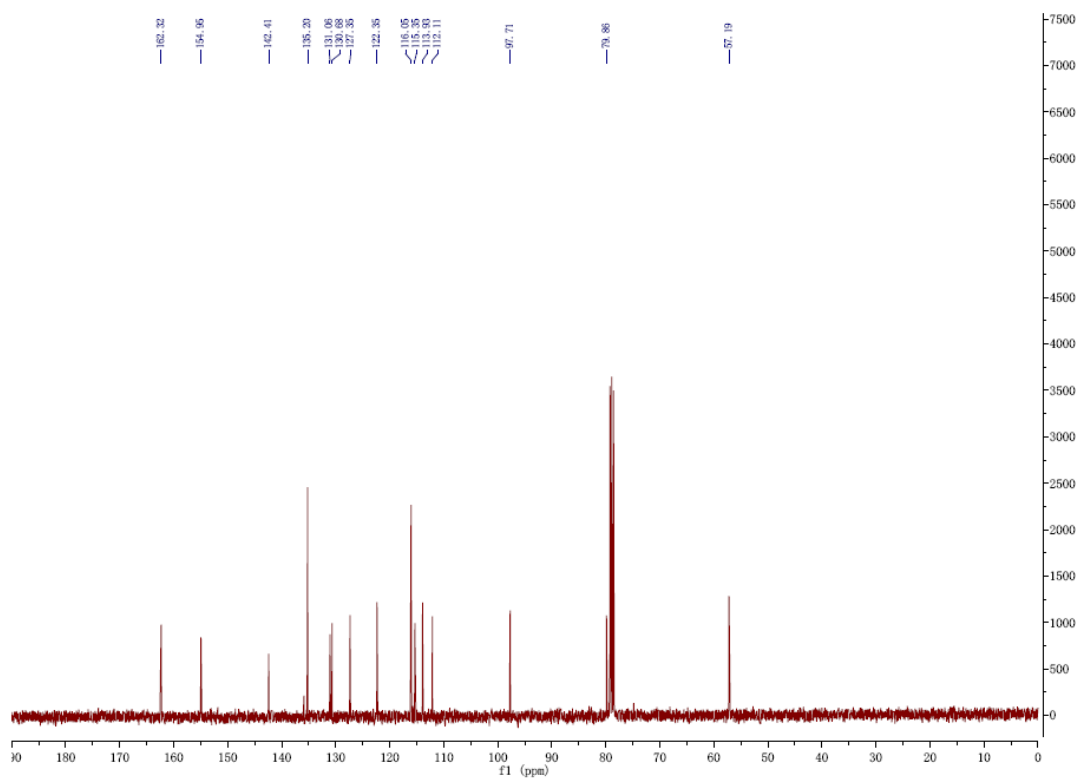

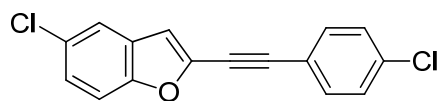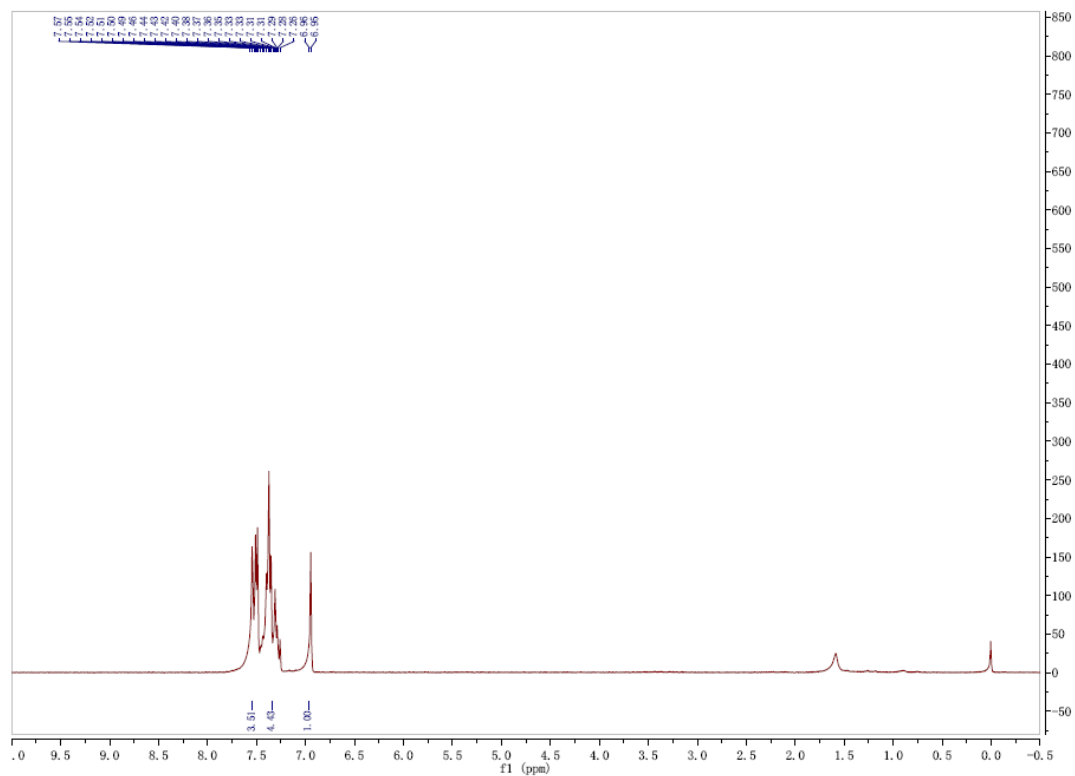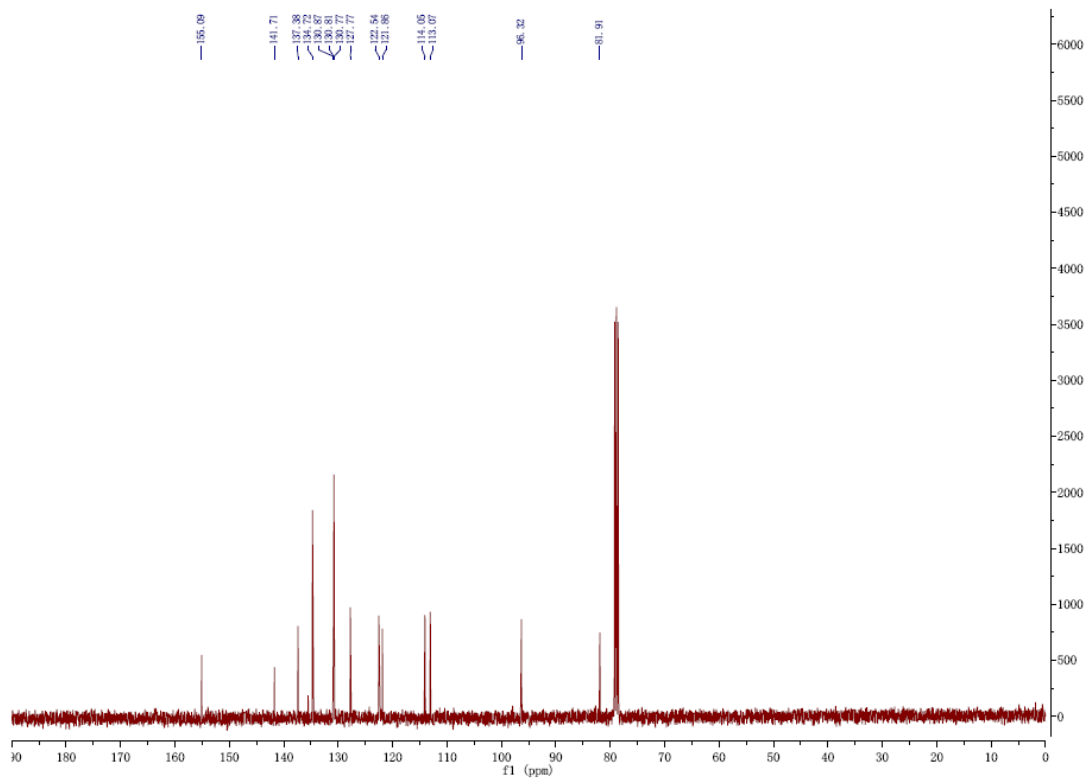



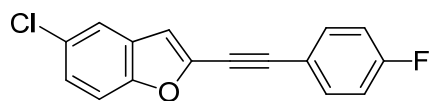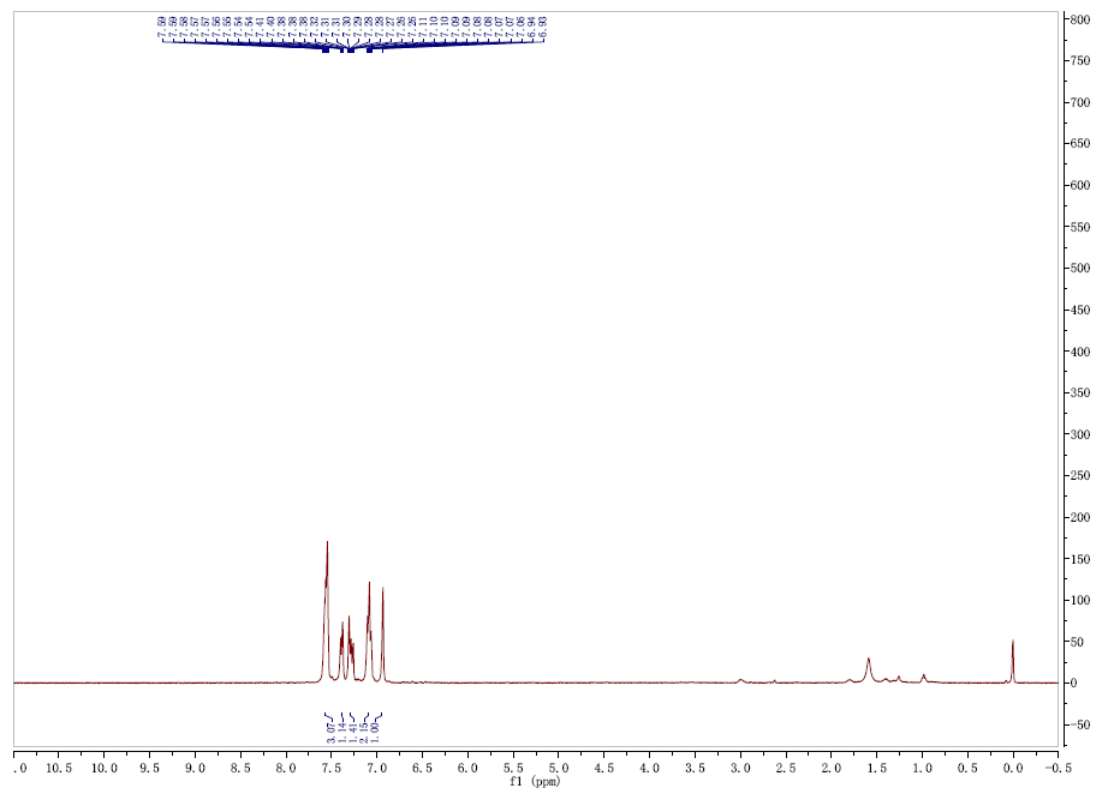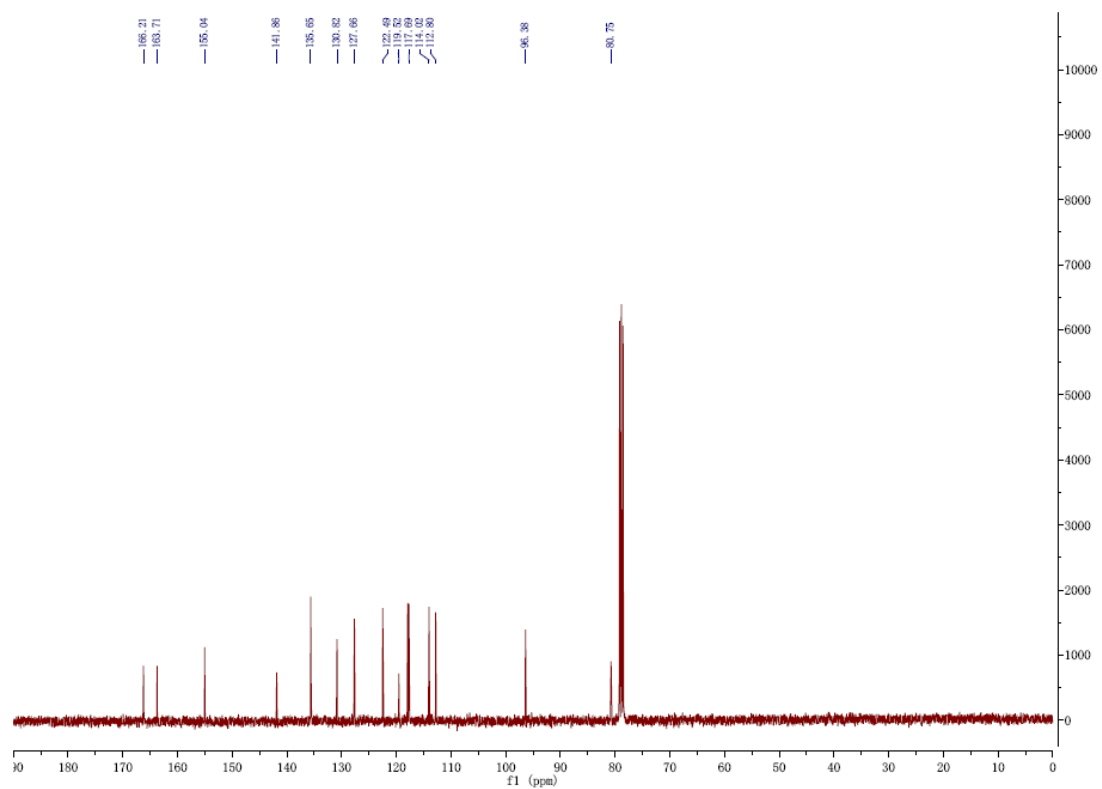

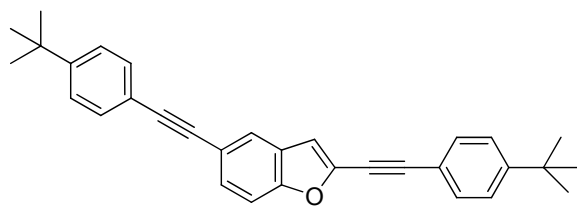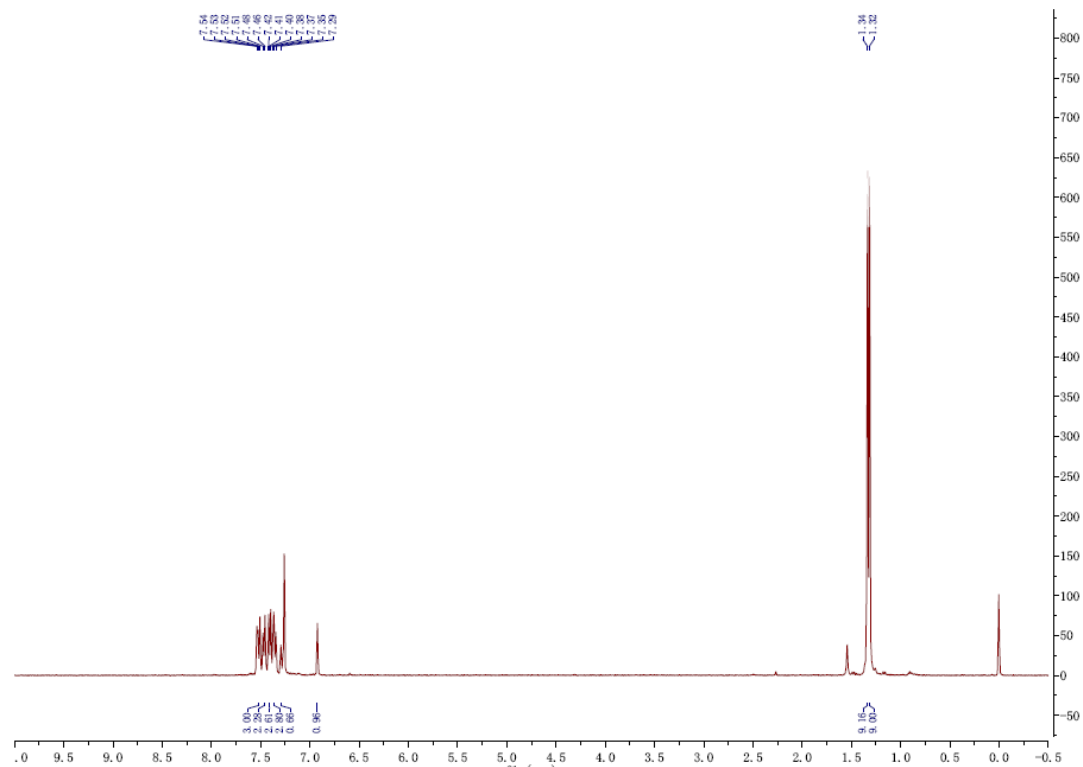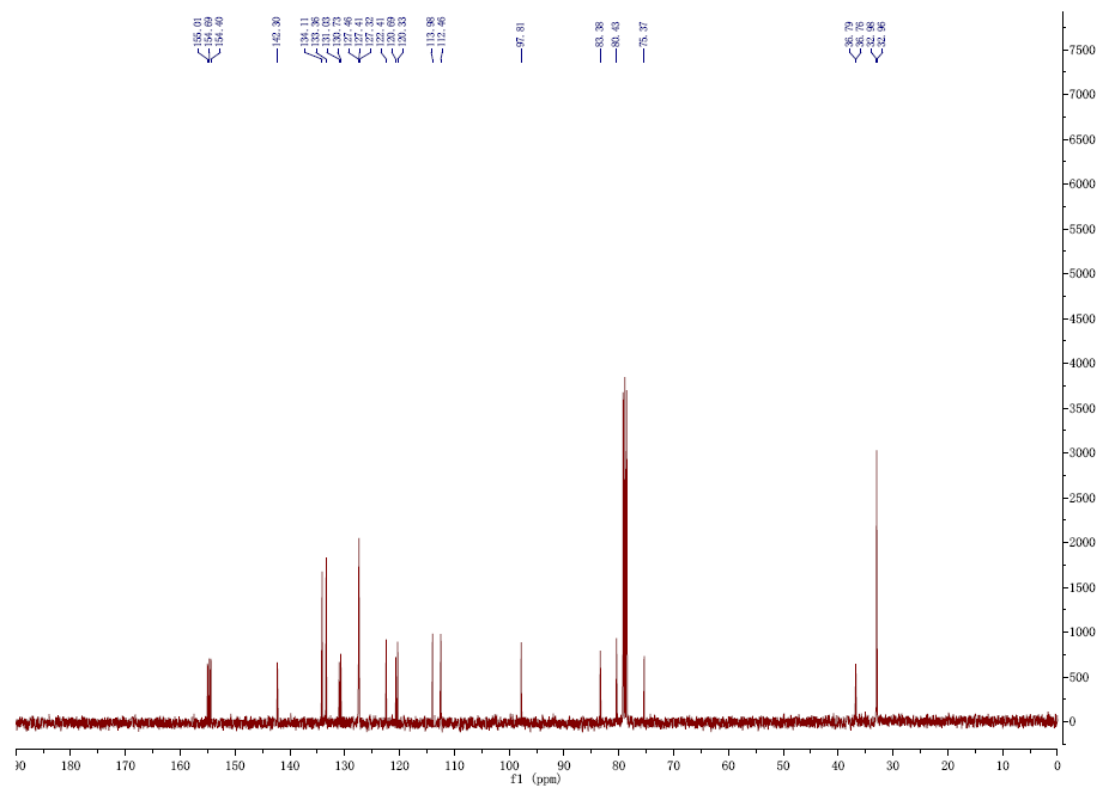

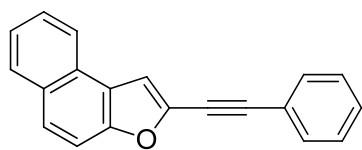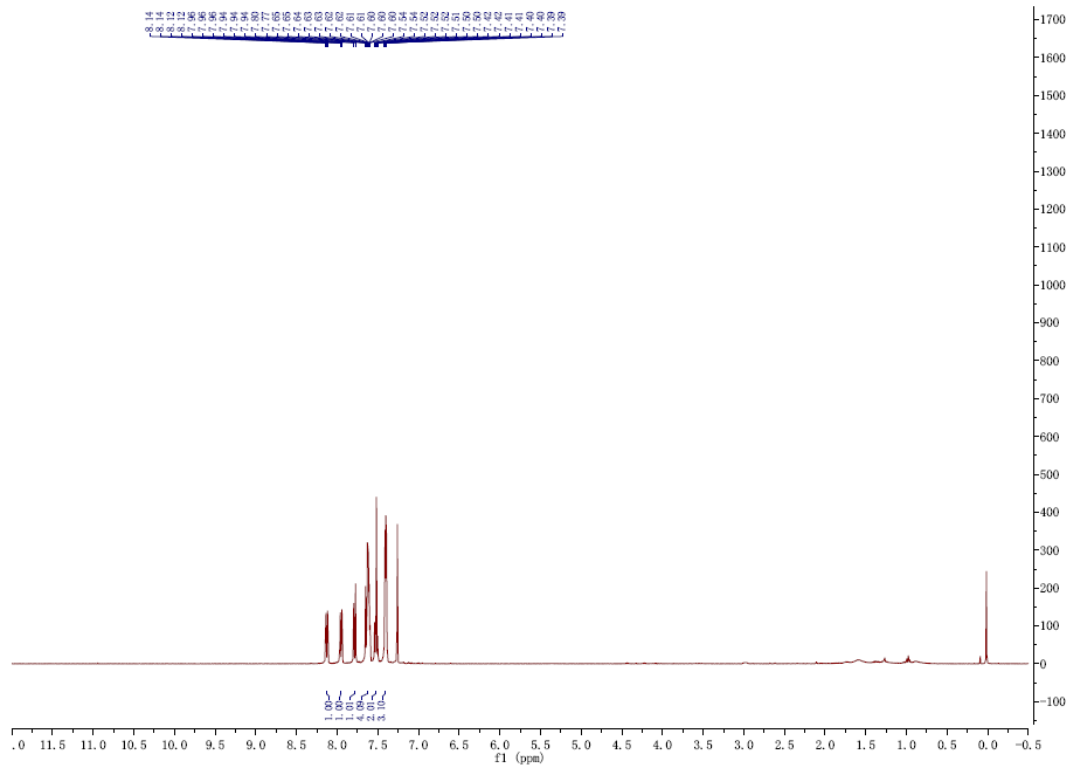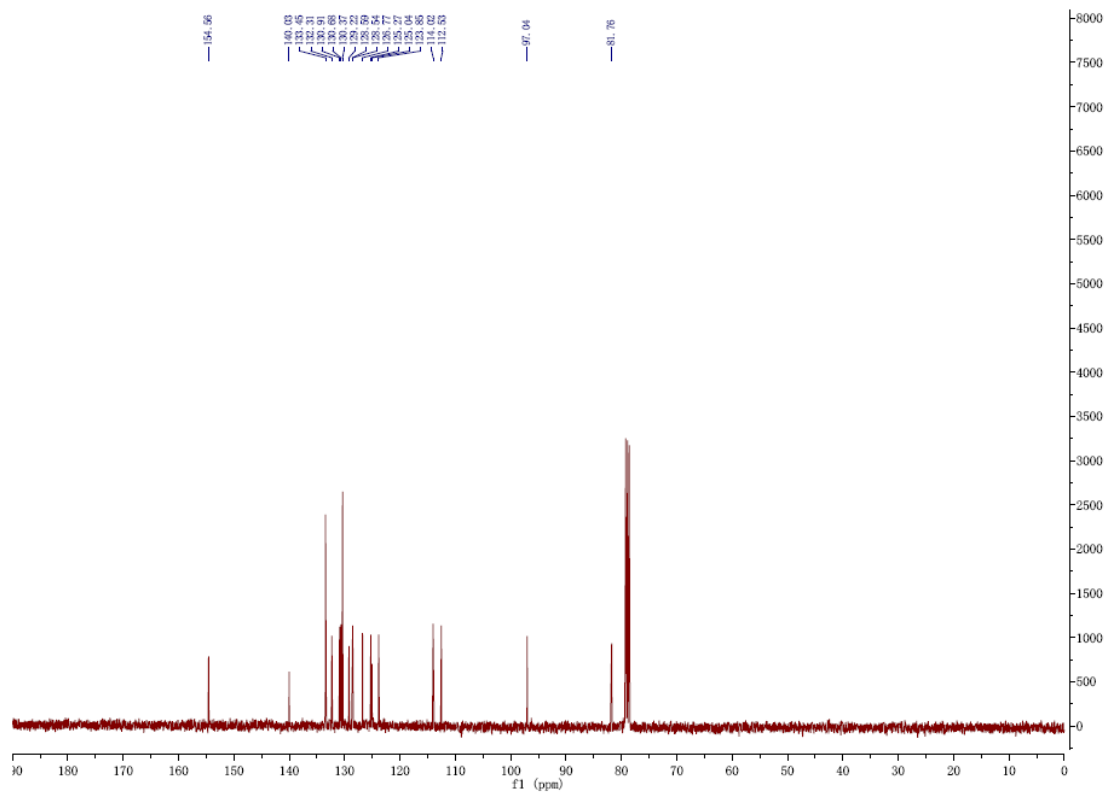



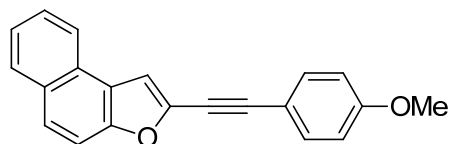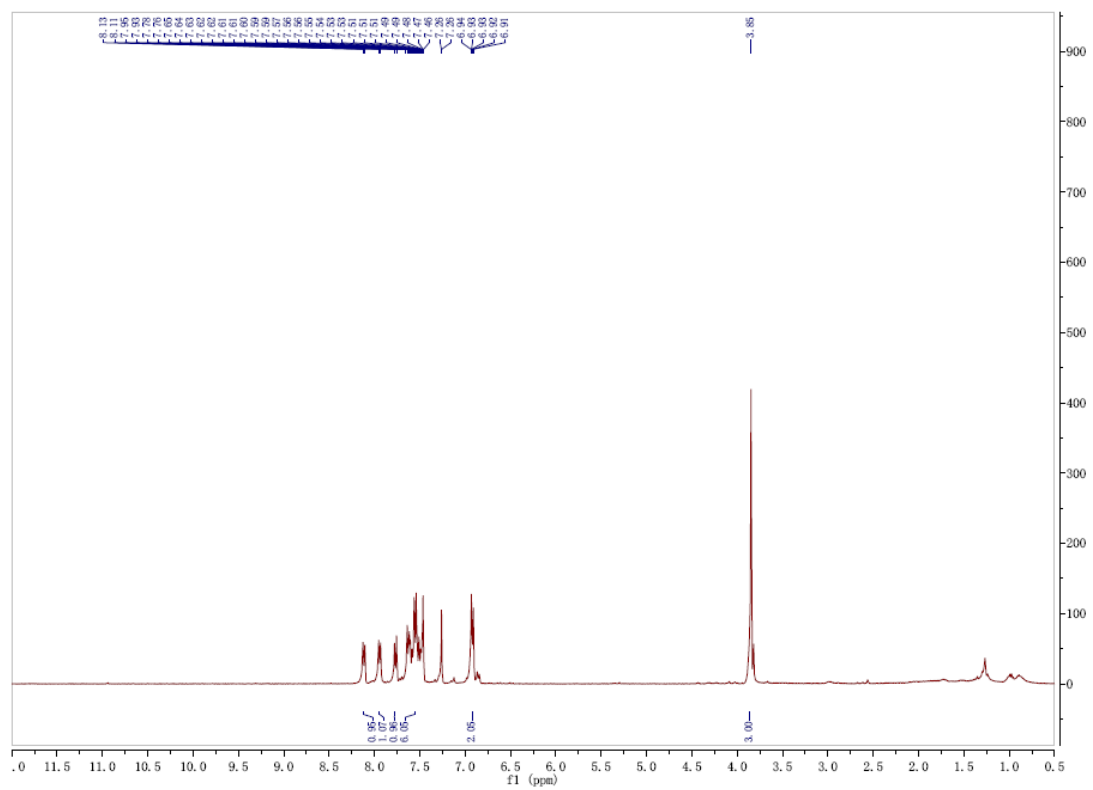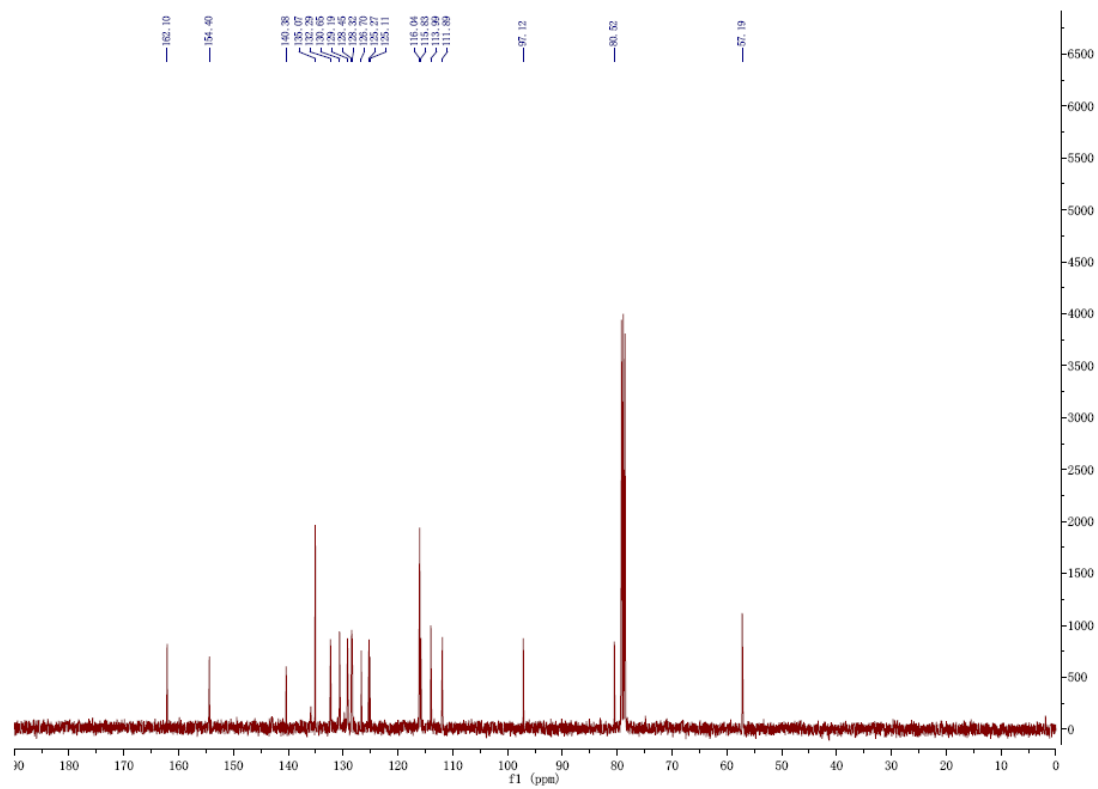



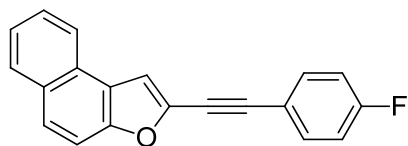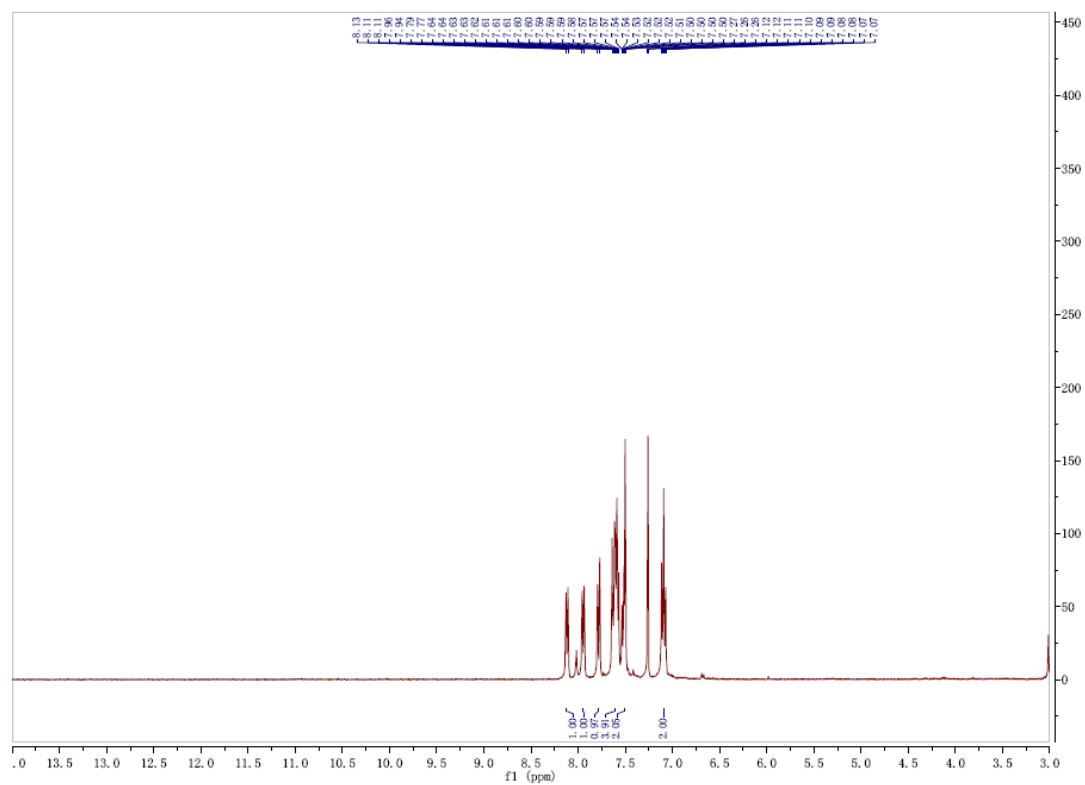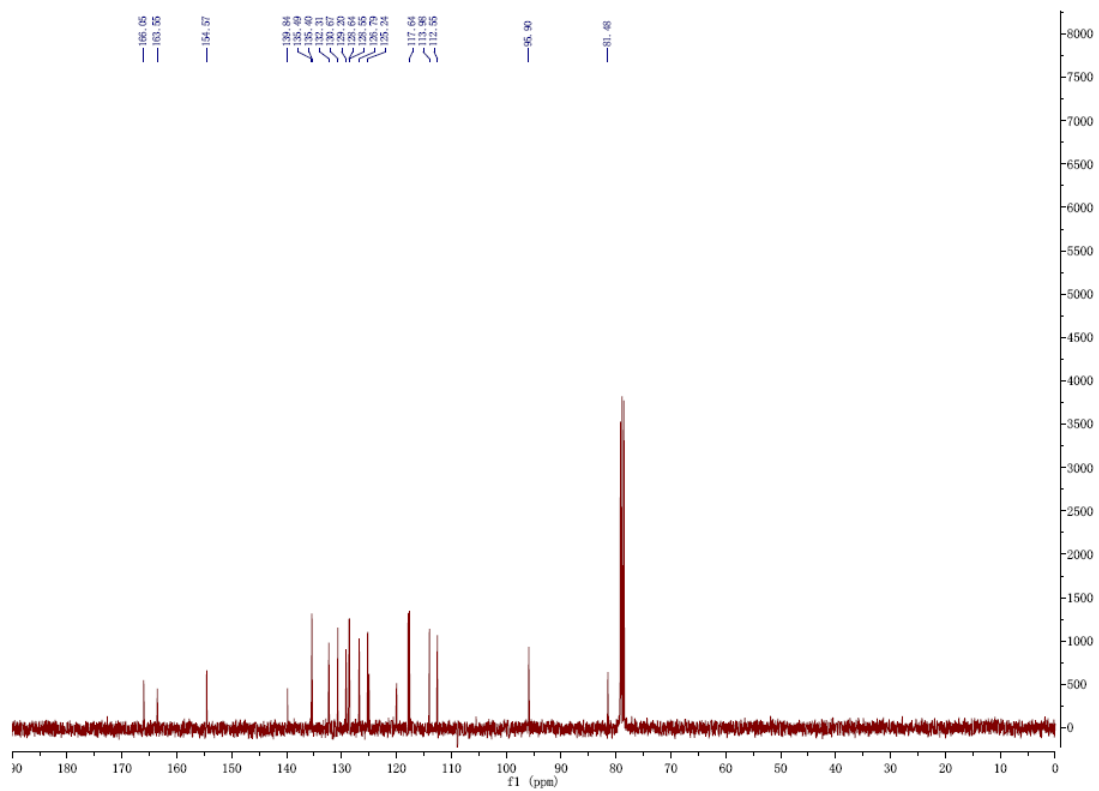





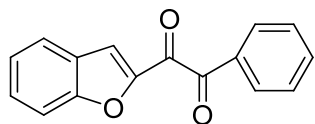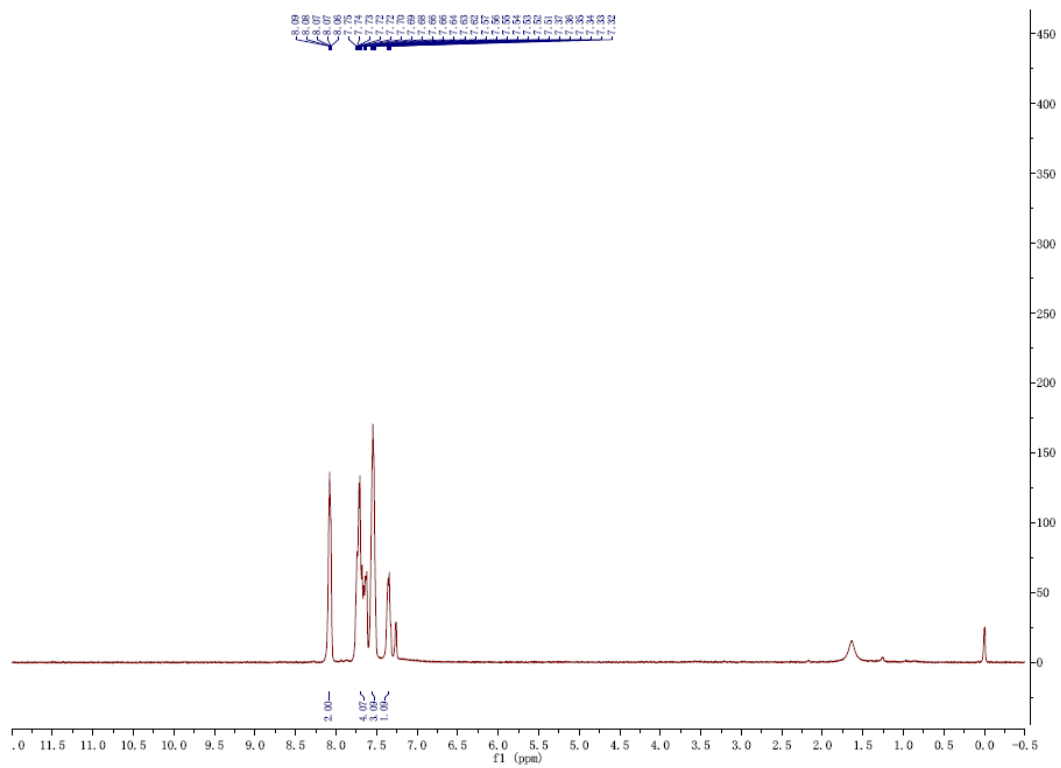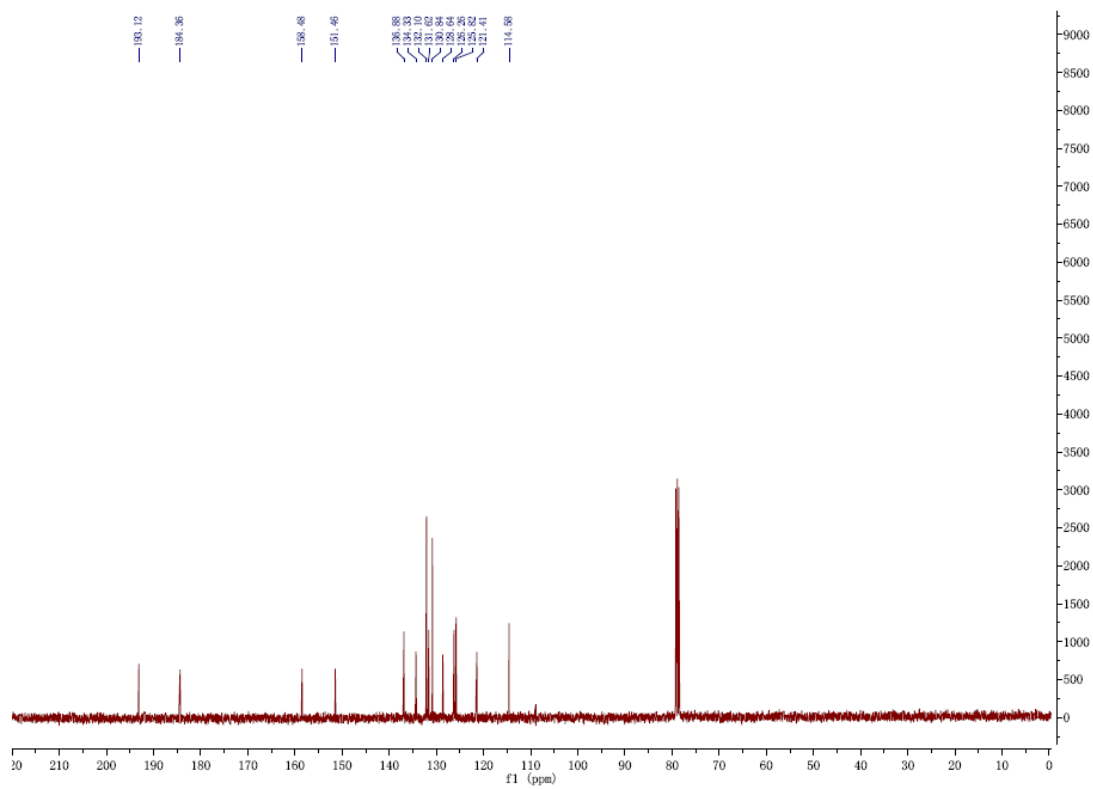

Supplement: c3ra00093a.pdf [file c3ra00093a.pdf]
